# Supplementary material
Source: PubMed Central journal article supplement (PMC10873804)
Supplement: jama-e240728-s004.pdf [file jama-e240728-s004.pdf]

\*Indicates required information. Only first name, last name, and suffix will appear in PubMed.

| <b>*Group Name(s): KARDIA-1 Study Group</b> |                   |                              |                  |             |                                          |                                                         |                                                                                            |  |  |  |
|---------------------------------------------|-------------------|------------------------------|------------------|-------------|------------------------------------------|---------------------------------------------------------|--------------------------------------------------------------------------------------------|--|--|--|
| <b>*First Name and Middle Initial(s)</b>    | <b>*Last Name</b> | <b>*Suffix (eg, Jr, III)</b> | Academic Degrees | Institution | Location (city, state/province, country) | Role or Contribution, eg, chair, principal investigator | Group (if more than 1 Group listed in the byline) and/or Subgroup (eg, Steering Committee) |  |  |  |
| George                                      | Carr              |                              |                  |             |                                          | Principal Investigator                                  |                                                                                            |  |  |  |
| Christopher                                 | Case              |                              |                  |             |                                          | Sub-Investigator                                        |                                                                                            |  |  |  |
| Lauren                                      | Jaeger            |                              |                  |             |                                          | Pharmacist                                              |                                                                                            |  |  |  |
| Lisa                                        | Bruns             |                              |                  |             |                                          | Study Coordinator                                       |                                                                                            |  |  |  |
| Ginger                                      | Stratman          |                              |                  |             |                                          | Pharmacist                                              |                                                                                            |  |  |  |
| Christy                                     | Kidwell           |                              |                  |             |                                          | Study Coordinator                                       |                                                                                            |  |  |  |
| Suzin                                       | Cunningham        |                              |                  |             |                                          | Study Coordinator                                       |                                                                                            |  |  |  |
| Nicholas                                    | Piccone           |                              |                  |             |                                          | Pharmacist                                              |                                                                                            |  |  |  |
| Mordecai                                    | Klein             |                              |                  |             |                                          | Principal Investigator                                  |                                                                                            |  |  |  |
| Maria                                       | Acuna             |                              |                  |             |                                          | Study Coordinator                                       |                                                                                            |  |  |  |
| Srishti                                     | Arora             |                              |                  |             |                                          | Study Coordinator                                       |                                                                                            |  |  |  |
| Amanda                                      | Clark             |                              |                  |             |                                          | Study Coordinator                                       |                                                                                            |  |  |  |
| Ezekiel                                     | Fink              |                              |                  |             |                                          | Sub-Investigator                                        |                                                                                            |  |  |  |
| Cesia                                       | Garcia            |                              |                  |             |                                          | Study Coordinator                                       |                                                                                            |  |  |  |
| Astrid                                      | George            |                              |                  |             |                                          | Pharmacist                                              |                                                                                            |  |  |  |
| Elizabeth                                   | Gray              |                              |                  |             |                                          | Sub-Investigator                                        |                                                                                            |  |  |  |
| Caroline                                    | Mahaffey          |                              |                  |             |                                          | Ethics/Regulatory Contact                               |                                                                                            |  |  |  |
| Maria                                       | McElheney         |                              |                  |             |                                          | Study Coordinator                                       |                                                                                            |  |  |  |
| Elizabeth                                   | Ortiz             |                              |                  |             |                                          | Sub-Investigator                                        |                                                                                            |  |  |  |
| Sunny                                       | Saumya            |                              |                  |             |                                          | Ethics/Regulatory Contact                               |                                                                                            |  |  |  |
| Adele                                       | Wallace           |                              |                  |             |                                          | Ethics/Regulatory Contact                               |                                                                                            |  |  |  |
| Jenelle                                     | Watts             |                              |                  |             |                                          | Sub-Investigator                                        |                                                                                            |  |  |  |
| Daisy                                       | Zambrana          |                              |                  |             |                                          | Study Coordinator                                       |                                                                                            |  |  |  |
| Douglas                                     | Denham            |                              |                  |             |                                          | Primary Investigator                                    |                                                                                            |  |  |  |
| Erica                                       | Rivera            |                              |                  |             |                                          | Study Coordinator                                       |                                                                                            |  |  |  |
| Ayoade                                      | Avworo            |                              |                  |             |                                          | Sub-Investigator                                        |                                                                                            |  |  |  |
| Parke                                       | Hedges            |                              |                  |             |                                          | Sub-Investigator                                        |                                                                                            |  |  |  |
| Corri                                       | Fancher           |                              |                  |             |                                          | Sub-Investigator                                        |                                                                                            |  |  |  |
| Rafik                                       | Abadier           |                              |                  |             |                                          | Principal Investigator                                  |                                                                                            |  |  |  |
| Lisa                                        | Braud             |                              |                  |             |                                          | Pharmacist                                              |                                                                                            |  |  |  |
| Laura                                       | Cenatiempo        |                              |                  |             |                                          | Study Coordinator                                       |                                                                                            |  |  |  |
| Amanda                                      | Elwood            |                              |                  |             |                                          | Ethics/Regulatory Contact                               |                                                                                            |  |  |  |
| Amanda                                      | Elwood            |                              |                  |             |                                          | Study Coordinator                                       |                                                                                            |  |  |  |
| Linda                                       | Gray              |                              |                  |             |                                          | Pharmacist                                              |                                                                                            |  |  |  |
| Peter                                       | Gray              |                              |                  |             |                                          | Lab Technician                                          |                                                                                            |  |  |  |
| Kimberly                                    | Griffin           |                              |                  |             |                                          | Study Nurse/Lead SC                                     |                                                                                            |  |  |  |
| Hasibul                                     | Khan              |                              |                  |             |                                          | Sub-Investigator                                        |                                                                                            |  |  |  |
| Nadeen                                      | Kongquee          |                              |                  |             |                                          | Recruitment and Retention                               |                                                                                            |  |  |  |
| Susan                                       | LaTorraca         |                              |                  |             |                                          | Study Coordinator                                       |                                                                                            |  |  |  |

Supplemental Online Content: Nonauthor Collaborators

\*Indicates required information. Only first name, last name, and suffix will appear in PubMed.

| *First Name and Middle Initial(s) | *Last Name    | *Suffix (eg, Jr, III) | Academic Degrees | Institution | Location (city, state/province, country) | Role or Contribution, eg, chair, principal investigator | Group (if more than 1 Group listed in the byline) and/or Subgroup (eg, Steering Committee) |  |  |  |  |  |  |
|-----------------------------------|---------------|-----------------------|------------------|-------------|------------------------------------------|---------------------------------------------------------|--------------------------------------------------------------------------------------------|--|--|--|--|--|--|
| Tiffany                           | Liles         |                       |                  |             |                                          | Study Coordinator                                       |                                                                                            |  |  |  |  |  |  |
| Jill                              | Livingston    |                       |                  |             |                                          | Study Coordinator                                       |                                                                                            |  |  |  |  |  |  |
| Marc                              | Lozano        |                       |                  |             |                                          | Sub-Investigator                                        |                                                                                            |  |  |  |  |  |  |
| Amy                               | Lupton        |                       |                  |             |                                          | Ethics/Regulatory Contact                               |                                                                                            |  |  |  |  |  |  |
| Tiffany                           | Lyles         |                       |                  |             |                                          | Study Coordinator                                       |                                                                                            |  |  |  |  |  |  |
| Deana                             | Mardini       |                       |                  |             |                                          | Ethics/Regulatory Contact                               |                                                                                            |  |  |  |  |  |  |
| Susan                             | Moss          |                       |                  |             |                                          | Pharmacist                                              |                                                                                            |  |  |  |  |  |  |
| Karen                             | Packer        |                       |                  |             |                                          | Pharmacist                                              |                                                                                            |  |  |  |  |  |  |
| Aakash                            | Patel         |                       |                  |             |                                          | Sub-Investigator                                        |                                                                                            |  |  |  |  |  |  |
| Tina                              | Russ          |                       |                  |             |                                          | Pharmacist                                              |                                                                                            |  |  |  |  |  |  |
| Brianna                           | Scinicariello |                       |                  |             |                                          | Study Coordinator                                       |                                                                                            |  |  |  |  |  |  |
| Shannon                           | Trull         |                       |                  |             |                                          | Study Coordinator                                       |                                                                                            |  |  |  |  |  |  |
| Blair                             | Warren        |                       |                  |             |                                          | Sub-Investigator                                        |                                                                                            |  |  |  |  |  |  |
| Fadi                              | Chalhoub      |                       |                  |             |                                          | Principal Investigator                                  |                                                                                            |  |  |  |  |  |  |
| Susan                             | Angel         |                       |                  |             |                                          | Sub-Investigator                                        |                                                                                            |  |  |  |  |  |  |
| Sujeeta                           | Dhakhwa       |                       |                  |             |                                          | Sub-Investigator                                        |                                                                                            |  |  |  |  |  |  |
| Ivy                               | Gabon         |                       |                  |             |                                          | Pharmacist                                              |                                                                                            |  |  |  |  |  |  |
| Leticia                           | Goodwin       |                       |                  |             |                                          | Pharmacist                                              |                                                                                            |  |  |  |  |  |  |
| Nandita                           | Joshi Jones   |                       |                  |             |                                          | Sub-Investigator                                        |                                                                                            |  |  |  |  |  |  |
| Mark                              | Joyce         |                       |                  |             |                                          | Sub-Investigator                                        |                                                                                            |  |  |  |  |  |  |
| Niketa                            | Kamble        |                       |                  |             |                                          | Study Coordinator                                       |                                                                                            |  |  |  |  |  |  |
| Brooke                            | McFall        |                       |                  |             |                                          | Study Coordinator                                       |                                                                                            |  |  |  |  |  |  |
| Rose                              | Githiiyu      |                       |                  |             |                                          | Study Coordinator                                       |                                                                                            |  |  |  |  |  |  |
| Leticia                           | Robinson      |                       |                  |             |                                          | Study Coordinator                                       |                                                                                            |  |  |  |  |  |  |
| Lauren                            | Tomlinson     |                       |                  |             |                                          | Data Management                                         |                                                                                            |  |  |  |  |  |  |
| Emir                              | Hadziavdic    |                       |                  |             |                                          | Data Management                                         |                                                                                            |  |  |  |  |  |  |
| Stephany                          | Vega          |                       |                  |             |                                          | Research Assistant/Lab                                  |                                                                                            |  |  |  |  |  |  |
| James                             | Greenwald     |                       |                  |             |                                          | Principal Investigator                                  |                                                                                            |  |  |  |  |  |  |
| Jessica                           | Achan         |                       |                  |             |                                          | Study Coordinator                                       |                                                                                            |  |  |  |  |  |  |
| Lucille                           | Ruiz          |                       |                  |             |                                          | Study Coordinator                                       |                                                                                            |  |  |  |  |  |  |
| Mehwish                           | Buksh         |                       |                  |             |                                          | Study Coordinator                                       |                                                                                            |  |  |  |  |  |  |
| Omkar                             | Chauhan       |                       |                  |             |                                          | Study Coordinator                                       |                                                                                            |  |  |  |  |  |  |
| Elisee                            | Derisseau     |                       |                  |             |                                          | Study Coordinator                                       |                                                                                            |  |  |  |  |  |  |
| Faith                             | Ferguson      |                       |                  |             |                                          | Pharmacist                                              |                                                                                            |  |  |  |  |  |  |
| Monika                            | Grabowski     |                       |                  |             |                                          | Study Coordinator                                       |                                                                                            |  |  |  |  |  |  |
| Larisa                            | Gumerova      |                       |                  |             |                                          | Sub-Investigator                                        |                                                                                            |  |  |  |  |  |  |
| Miriam                            | Hernandez     |                       |                  |             |                                          | Study Coordinator                                       |                                                                                            |  |  |  |  |  |  |
| Kenna                             | Martin        |                       |                  |             |                                          | Study Coordinator                                       |                                                                                            |  |  |  |  |  |  |
| Krina                             | Patel         |                       |                  |             |                                          | Study Coordinator                                       |                                                                                            |  |  |  |  |  |  |
| Dibnain                           | Nanda         |                       |                  |             |                                          | Sub-Investigator                                        |                                                                                            |  |  |  |  |  |  |

Supplemental Online Content: Nonauthor Collaborators

\*Indicates required information. Only first name, last name, and suffix will appear in PubMed.

| *First Name and Middle Initial(s) | *Last Name | *Suffix (eg, Jr, III) | Academic Degrees | Institution | Location (city, state/province, country) | Role or Contribution, eg, chair, principal investigator | Group (if more than 1 Group listed in the byline) and/or Subgroup (eg, Steering Committee) |  |  |  |  |  |  |  |
|-----------------------------------|------------|-----------------------|------------------|-------------|------------------------------------------|---------------------------------------------------------|--------------------------------------------------------------------------------------------|--|--|--|--|--|--|--|
| Jose                              | Perez      |                       |                  |             |                                          | Pharmacist                                              |                                                                                            |  |  |  |  |  |  |  |
| Corey                             | Ribeca     |                       |                  |             |                                          | Pharmacist                                              |                                                                                            |  |  |  |  |  |  |  |
| Elijah                            | Rueda      |                       |                  |             |                                          | Study Coordinator                                       |                                                                                            |  |  |  |  |  |  |  |
| Ana                               | Sordi Guth |                       |                  |             |                                          | Study Coordinator                                       |                                                                                            |  |  |  |  |  |  |  |
| Nader                             | Zaki       |                       |                  |             |                                          | Sub-Investigator                                        |                                                                                            |  |  |  |  |  |  |  |
| Ebony                             | Green      |                       |                  |             |                                          | Study Coordinator                                       |                                                                                            |  |  |  |  |  |  |  |
| Nina                              | Mondoc     |                       |                  |             |                                          | Study Coordinator                                       |                                                                                            |  |  |  |  |  |  |  |
| Robert                            | Buynak     |                       |                  |             |                                          | Principal Investigator                                  |                                                                                            |  |  |  |  |  |  |  |
| Stephanie                         | Andree     |                       |                  |             |                                          | Sub-Investigator                                        |                                                                                            |  |  |  |  |  |  |  |
| Martha                            | Brazinsky  |                       |                  |             |                                          | Laboratory Contact                                      |                                                                                            |  |  |  |  |  |  |  |
| Lisa                              | Fuller     |                       |                  |             |                                          | Laboratory Contact                                      |                                                                                            |  |  |  |  |  |  |  |
| Nikki                             | Green      |                       |                  |             |                                          | Study Coordinator                                       |                                                                                            |  |  |  |  |  |  |  |
| Hannade                           | Ibrahim    |                       |                  |             |                                          | Ethics/Regulatory Contact                               |                                                                                            |  |  |  |  |  |  |  |
| Marilyn                           | Idowu      |                       |                  |             |                                          | Study Coordinator                                       |                                                                                            |  |  |  |  |  |  |  |
| Miranda                           | Lee        |                       |                  |             |                                          | Study Coordinator                                       |                                                                                            |  |  |  |  |  |  |  |
| Erica                             | Lewis      |                       |                  |             |                                          | Study Coordinator                                       |                                                                                            |  |  |  |  |  |  |  |
| Goldie                            | Luna       |                       |                  |             |                                          | Pharmacist                                              |                                                                                            |  |  |  |  |  |  |  |
| Rachel                            | McNeal     |                       |                  |             |                                          | Pharmacist                                              |                                                                                            |  |  |  |  |  |  |  |
| Alicia                            | Owens      |                       |                  |             |                                          | Pharmacist                                              |                                                                                            |  |  |  |  |  |  |  |
| Consuelita                        | Perez      |                       |                  |             |                                          | Study Coordinator                                       |                                                                                            |  |  |  |  |  |  |  |
| Taryn                             | Petty      |                       |                  |             |                                          | Sub-Investigator                                        |                                                                                            |  |  |  |  |  |  |  |
| Megan                             | Smith      |                       |                  |             |                                          | Pharmacist                                              |                                                                                            |  |  |  |  |  |  |  |
| Patricia                          | Volom      |                       |                  |             |                                          | Study Coordinator                                       |                                                                                            |  |  |  |  |  |  |  |
| Angela                            | Webb       |                       |                  |             |                                          | Sub-Investigator                                        |                                                                                            |  |  |  |  |  |  |  |
| Destiny                           | Williams   |                       |                  |             |                                          | Study Coordinator                                       |                                                                                            |  |  |  |  |  |  |  |
| Mark                              | Yarosz     |                       |                  |             |                                          | Research Director                                       |                                                                                            |  |  |  |  |  |  |  |
| Nashwa                            | Gabra      |                       |                  |             |                                          | Principal Investigator                                  |                                                                                            |  |  |  |  |  |  |  |
| Nabil                             | Andrawis   |                       |                  |             |                                          | Sub-Investigator                                        |                                                                                            |  |  |  |  |  |  |  |
| Amy                               | Aziz       |                       |                  |             |                                          | Study Coordinator                                       |                                                                                            |  |  |  |  |  |  |  |
| Magda                             | Hanna      |                       |                  |             |                                          | Unblinded Study Coordinator                             |                                                                                            |  |  |  |  |  |  |  |
| Josefina                          | Manalo     |                       |                  |             |                                          | Primary Study Coordinator                               |                                                                                            |  |  |  |  |  |  |  |
| Victoria                          | Helow      |                       |                  |             |                                          | Principal Investigator                                  |                                                                                            |  |  |  |  |  |  |  |
| William                           | Davila     |                       |                  |             |                                          | Old Principal Investigator                              |                                                                                            |  |  |  |  |  |  |  |
| Sydney                            | Crisp      |                       |                  |             |                                          | Study Coordinator                                       |                                                                                            |  |  |  |  |  |  |  |
| Yvonne                            | Douglas    |                       |                  |             |                                          | Study Coordinator                                       |                                                                                            |  |  |  |  |  |  |  |
| Amanda                            | Elwood     |                       |                  |             |                                          | Ethics/Regulatory Contact                               |                                                                                            |  |  |  |  |  |  |  |
| Jenna                             | Everett    |                       |                  |             |                                          | Recruitment                                             |                                                                                            |  |  |  |  |  |  |  |
| Sarah                             | Graham     |                       |                  |             |                                          | Sub-Investigator                                        |                                                                                            |  |  |  |  |  |  |  |
| Ellen                             | Heard      |                       |                  |             |                                          | Laboratory                                              |                                                                                            |  |  |  |  |  |  |  |
| Michelle                          | Mackie     |                       |                  |             |                                          | Pharmacist                                              |                                                                                            |  |  |  |  |  |  |  |

Supplemental Online Content: Nonauthor Collaborators

\*Indicates required information. Only first name, last name, and suffix will appear in PubMed.

| *First Name and Middle Initial(s) | *Last Name          | *Suffix (eg, Jr, III) | Academic Degrees | Institution | Location (city, state/province, country) | Role or Contribution, eg, chair, principal investigator | Group (if more than 1 Group listed in the byline) and/or Subgroup (eg, Steering Committee) |  |  |  |  |  |  |
|-----------------------------------|---------------------|-----------------------|------------------|-------------|------------------------------------------|---------------------------------------------------------|--------------------------------------------------------------------------------------------|--|--|--|--|--|--|
| Suman                             | Mayer               |                       |                  |             |                                          | Sub-Investigator                                        |                                                                                            |  |  |  |  |  |  |
| Lisa                              | Moore               |                       |                  |             |                                          | Study Coordinator, Primary                              |                                                                                            |  |  |  |  |  |  |
| Stephanie                         | Resurreccion        |                       |                  |             |                                          | Pharmacist                                              |                                                                                            |  |  |  |  |  |  |
| Jennifer                          | Sidey               |                       |                  |             |                                          | Sub-Investigator                                        |                                                                                            |  |  |  |  |  |  |
| Michael                           | Stephens            |                       |                  |             |                                          | Sub-Investigator                                        |                                                                                            |  |  |  |  |  |  |
| Mary                              | Strickland          |                       |                  |             |                                          | Pharmacist                                              |                                                                                            |  |  |  |  |  |  |
| Dawn                              | Van Camp            |                       |                  |             |                                          | Study Coordinator                                       |                                                                                            |  |  |  |  |  |  |
| Stephanie                         | Wilder              |                       |                  |             |                                          | Sub-Investigator                                        |                                                                                            |  |  |  |  |  |  |
| Anne                              | Witt                |                       |                  |             |                                          | Sub-Investigator                                        |                                                                                            |  |  |  |  |  |  |
| Jolene                            | Wolfer              |                       |                  |             |                                          | Administrator                                           |                                                                                            |  |  |  |  |  |  |
| Lucas                             | Groben              |                       |                  |             |                                          | Principal Investigator                                  |                                                                                            |  |  |  |  |  |  |
| Lindsey                           | Aeschliman          |                       |                  |             |                                          | Sub-Investigator                                        |                                                                                            |  |  |  |  |  |  |
| Emily                             | Audlehelm           |                       |                  |             |                                          | Unblinded Study Coordinator                             |                                                                                            |  |  |  |  |  |  |
| Casey                             | Fitz                |                       |                  |             |                                          | Sub-Investigator                                        |                                                                                            |  |  |  |  |  |  |
| Judi                              | Greene              |                       |                  |             |                                          | Unblinded Study Coordinator                             |                                                                                            |  |  |  |  |  |  |
| Emily                             | Hippen              |                       |                  |             |                                          | Ethics/Regulatory Contact                               |                                                                                            |  |  |  |  |  |  |
| Michelle                          | Johnson             |                       |                  |             |                                          | Unblinded Study Coordinator                             |                                                                                            |  |  |  |  |  |  |
| Allan                             | Latcham             |                       |                  |             |                                          | Sub-Investigator                                        |                                                                                            |  |  |  |  |  |  |
| Shekela                           | Leggett             |                       |                  |             |                                          | Study Coordinator                                       |                                                                                            |  |  |  |  |  |  |
| Keeta                             | Link                |                       |                  |             |                                          | Research Assistant                                      |                                                                                            |  |  |  |  |  |  |
| James                             | Lovell              |                       |                  |             |                                          | Sub-Investigator                                        |                                                                                            |  |  |  |  |  |  |
| Kourtney                          | Marlow              |                       |                  |             |                                          | Study Coordinator                                       |                                                                                            |  |  |  |  |  |  |
| Cynthia                           | Marske              |                       |                  |             |                                          | Sub-Investigator                                        |                                                                                            |  |  |  |  |  |  |
| Kelsey                            | Maxwell             |                       |                  |             |                                          | Study Coordinator                                       |                                                                                            |  |  |  |  |  |  |
| Charlotte                         | Newsom-Henderson    |                       |                  |             |                                          | Recruitment and Retention                               |                                                                                            |  |  |  |  |  |  |
| Darcie                            | Oelberg             |                       |                  |             |                                          | Study Coordinator                                       |                                                                                            |  |  |  |  |  |  |
| Kathleen                          | Ollinger            |                       |                  |             |                                          | Unblinded Study Coordinator                             |                                                                                            |  |  |  |  |  |  |
| Rebecca                           | Risius              |                       |                  |             |                                          | Unblinded Study Coordinator                             |                                                                                            |  |  |  |  |  |  |
| Kylea                             | Ryther              |                       |                  |             |                                          | Sub-Investigator                                        |                                                                                            |  |  |  |  |  |  |
| Alyssa                            | Waddell             |                       |                  |             |                                          | Sub-Investigator                                        |                                                                                            |  |  |  |  |  |  |
| Tyler                             | Zellerman           |                       |                  |             |                                          | Study Coordinator                                       |                                                                                            |  |  |  |  |  |  |
| Martin                            | Albornoz Santofimio |                       |                  |             |                                          | Principal Investigator                                  |                                                                                            |  |  |  |  |  |  |
| Stephen                           | Plantholt           |                       |                  |             |                                          | Old Principal Investigator                              |                                                                                            |  |  |  |  |  |  |
| Morgan                            | Beatty              |                       |                  |             |                                          | Study Nurse                                             |                                                                                            |  |  |  |  |  |  |
| Heather                           | Blubaugh            |                       |                  |             |                                          | Sub-Investigator                                        |                                                                                            |  |  |  |  |  |  |
| Tina                              | Bootz               |                       |                  |             |                                          | Ethics/Regulatory Contact                               |                                                                                            |  |  |  |  |  |  |
| Jeffrey                           | Cole                |                       |                  |             |                                          | Sub-Investigator                                        |                                                                                            |  |  |  |  |  |  |
| Jasmine                           | Conners             |                       |                  |             |                                          | Study Nurse                                             |                                                                                            |  |  |  |  |  |  |
| Vicki                             | Coombs              |                       |                  |             |                                          | Sub-Investigator                                        |                                                                                            |  |  |  |  |  |  |

Supplemental Online Content: Nonauthor Collaborators

\*Indicates required information. Only first name, last name, and suffix will appear in PubMed.

| *First Name and Middle Initial(s) | *Last Name      | *Suffix (eg, Jr, III) | Academic Degrees | Institution | Location (city, state/province, country) | Role or Contribution, eg, chair, principal investigator | Group (if more than 1 Group listed in the byline) and/or Subgroup (eg, Steering Committee) |  |  |  |  |  |  |
|-----------------------------------|-----------------|-----------------------|------------------|-------------|------------------------------------------|---------------------------------------------------------|--------------------------------------------------------------------------------------------|--|--|--|--|--|--|
| Chloe                             | Goddard         |                       |                  |             |                                          | Study Coordinator                                       |                                                                                            |  |  |  |  |  |  |
| Carlos                            | Ince            |                       |                  |             |                                          | Sub-Investigator                                        |                                                                                            |  |  |  |  |  |  |
| Gail                              | Kiddy           |                       |                  |             |                                          | Site Budget Contact                                     |                                                                                            |  |  |  |  |  |  |
| Barbara                           | Klimuszka       |                       |                  |             |                                          | Research Nurse                                          |                                                                                            |  |  |  |  |  |  |
| Frederick                         | Kuhn            |                       |                  |             |                                          | Sub-Investigator                                        |                                                                                            |  |  |  |  |  |  |
| David                             | Lowry           |                       |                  |             |                                          | Study Coordinator                                       |                                                                                            |  |  |  |  |  |  |
| Patricia                          | Previll         |                       |                  |             |                                          | Administrator                                           |                                                                                            |  |  |  |  |  |  |
| Stephanie                         | Rioux           |                       |                  |             |                                          | Study Nurse                                             |                                                                                            |  |  |  |  |  |  |
| Jasmine                           | Scott           |                       |                  |             |                                          | Study Coordinator                                       |                                                                                            |  |  |  |  |  |  |
| Britney                           | Shepherd        |                       |                  |             |                                          | Study Nurse                                             |                                                                                            |  |  |  |  |  |  |
| Amy                               | Urffer          |                       |                  |             |                                          | Study Nurse                                             |                                                                                            |  |  |  |  |  |  |
| Sarah                             | Smiley          |                       |                  |             |                                          | Principal Investigator                                  |                                                                                            |  |  |  |  |  |  |
| Gregg                             | Lucksinger      |                       |                  |             |                                          | Old Principal Investigator                              |                                                                                            |  |  |  |  |  |  |
| Allison                           | Alvord          |                       |                  |             |                                          | Sub-Investigator                                        |                                                                                            |  |  |  |  |  |  |
| Jordan                            | Anderson        |                       |                  |             |                                          | Study Coordinator                                       |                                                                                            |  |  |  |  |  |  |
| Courtney                          | Block           |                       |                  |             |                                          | Study Coordinator                                       |                                                                                            |  |  |  |  |  |  |
| Ashley                            | Chan            |                       |                  |             |                                          | Sub-Investigator                                        |                                                                                            |  |  |  |  |  |  |
| John                              | Delgado         |                       |                  |             |                                          | Sub-Investigator                                        |                                                                                            |  |  |  |  |  |  |
| Kambrea                           | Frost           |                       |                  |             |                                          | Study Coordinator                                       |                                                                                            |  |  |  |  |  |  |
| Levi                              | Gadbois         |                       |                  |             |                                          | Sub-Investigator                                        |                                                                                            |  |  |  |  |  |  |
| Daniel                            | Hamlin          |                       |                  |             |                                          | Sub-Investigator                                        |                                                                                            |  |  |  |  |  |  |
| Sarah                             | Johnson         |                       |                  |             |                                          | Regulatory Admin                                        |                                                                                            |  |  |  |  |  |  |
| Vivianna                          | Juncal          |                       |                  |             |                                          | Sub-Investigator                                        |                                                                                            |  |  |  |  |  |  |
| Kary                              | Kelly           |                       |                  |             |                                          | Sub-Investigator                                        |                                                                                            |  |  |  |  |  |  |
| Emily                             | Kelly           |                       |                  |             |                                          | Regulatory Admin                                        |                                                                                            |  |  |  |  |  |  |
| Lilly                             | Kelly           |                       |                  |             |                                          | Sub-Investigator                                        |                                                                                            |  |  |  |  |  |  |
| Avery                             | Kerwin          |                       |                  |             |                                          | Study Coordinator                                       |                                                                                            |  |  |  |  |  |  |
| Audrey                            | Kuehl           |                       |                  |             |                                          | Study Coordinator                                       |                                                                                            |  |  |  |  |  |  |
| Jaleh                             | Ostovar         |                       |                  |             |                                          | Sub-Investigator                                        |                                                                                            |  |  |  |  |  |  |
| Ryan                              | Rackley         |                       |                  |             |                                          | Sub-Investigator                                        |                                                                                            |  |  |  |  |  |  |
| George                            | Rocha           |                       |                  |             |                                          | Sub-Investigator                                        |                                                                                            |  |  |  |  |  |  |
| Lacee                             | Sandberg        |                       |                  |             |                                          | Pharmacist                                              |                                                                                            |  |  |  |  |  |  |
| Sarah                             | Sheghewi        |                       |                  |             |                                          | Sub-Investigator                                        |                                                                                            |  |  |  |  |  |  |
| Tiffany                           | Smith           |                       |                  |             |                                          | Sub-Investigator                                        |                                                                                            |  |  |  |  |  |  |
| Ben                               | Taucher         |                       |                  |             |                                          | Sub-Investigator                                        |                                                                                            |  |  |  |  |  |  |
| Cecilia                           | Vasquez         |                       |                  |             |                                          | Regulatory Admin                                        |                                                                                            |  |  |  |  |  |  |
| Francisca                         | Villa Rodriguez |                       |                  |             |                                          | Study Coordinator                                       |                                                                                            |  |  |  |  |  |  |
| Jay                               | Weisbart        |                       |                  |             |                                          | Sub-Investigator                                        |                                                                                            |  |  |  |  |  |  |
| Veronica                          | Wescom          |                       |                  |             |                                          | Study Coordinator                                       |                                                                                            |  |  |  |  |  |  |
| Keenan                            | Williams        |                       |                  |             |                                          | Regulatory Admin                                        |                                                                                            |  |  |  |  |  |  |

Supplemental Online Content: Nonauthor Collaborators

\*Indicates required information. Only first name, last name, and suffix will appear in PubMed.

| *First Name and Middle Initial(s) | *Last Name   | *Suffix (eg, Jr, III) | Academic Degrees | Institution | Location (city, state/province, country) | Role or Contribution, eg, chair, principal investigator | Group (if more than 1 Group listed in the byline) and/or Subgroup (eg, Steering Committee) |  |  |  |  |  |  |
|-----------------------------------|--------------|-----------------------|------------------|-------------|------------------------------------------|---------------------------------------------------------|--------------------------------------------------------------------------------------------|--|--|--|--|--|--|
| Jeffrey Scott                     | Overcash     |                       |                  |             |                                          | Principal Investigator                                  |                                                                                            |  |  |  |  |  |  |
| Angela                            | Anorve       |                       |                  |             |                                          | Study Coordinator                                       |                                                                                            |  |  |  |  |  |  |
| Hunter                            | Asmann       |                       |                  |             |                                          | Study Coordinator, Primary                              |                                                                                            |  |  |  |  |  |  |
| Gordon                            | Bovee        |                       |                  |             |                                          | Study Coordinator                                       |                                                                                            |  |  |  |  |  |  |
| Laura                             | Castillo     |                       |                  |             |                                          | Study Coordinator                                       |                                                                                            |  |  |  |  |  |  |
| Hanh                              | Chu          |                       |                  |             |                                          | Sub-Investigator                                        |                                                                                            |  |  |  |  |  |  |
| Jordan                            | Coslet       |                       |                  |             |                                          | Sub-Investigator                                        |                                                                                            |  |  |  |  |  |  |
| Allison                           | Davis        |                       |                  |             |                                          | Pharmacist                                              |                                                                                            |  |  |  |  |  |  |
| Mary                              | Dinan        |                       |                  |             |                                          | Pharmacist                                              |                                                                                            |  |  |  |  |  |  |
| Amanda                            | Dubbula      |                       |                  |             |                                          | Study Coordinator                                       |                                                                                            |  |  |  |  |  |  |
| Jacob                             | Esparza      |                       |                  |             |                                          | Laboratory Contact                                      |                                                                                            |  |  |  |  |  |  |
| Ann                               | Foster       |                       |                  |             |                                          | Recruitment and Retention                               |                                                                                            |  |  |  |  |  |  |
| Andrea                            | Garcia       |                       |                  |             |                                          | Pharmacist                                              |                                                                                            |  |  |  |  |  |  |
| Jessica                           | Gonzales     |                       |                  |             |                                          | Study Coordinator                                       |                                                                                            |  |  |  |  |  |  |
| Lizette                           | Gonzalez     |                       |                  |             |                                          | Study Coordinator                                       |                                                                                            |  |  |  |  |  |  |
| Pat                               | Kappen       |                       |                  |             |                                          | Ethics/Regulatory Contact                               |                                                                                            |  |  |  |  |  |  |
| Allison                           | Kornblatt    |                       |                  |             |                                          | Sub-Investigator                                        |                                                                                            |  |  |  |  |  |  |
| Brandon                           | Lauderdale   |                       |                  |             |                                          | Study Coordinator                                       |                                                                                            |  |  |  |  |  |  |
| Kia                               | Lee          |                       |                  |             |                                          | Sub-Investigator                                        |                                                                                            |  |  |  |  |  |  |
| Sylvia                            | Lindholm     |                       |                  |             |                                          | Study Coordinator                                       |                                                                                            |  |  |  |  |  |  |
| Ashliegh                          | Lindsay      |                       |                  |             |                                          | Study Coordinator                                       |                                                                                            |  |  |  |  |  |  |
| Luis                              | Llanos Gomez |                       |                  |             |                                          | Study Coordinator                                       |                                                                                            |  |  |  |  |  |  |
| Adrienna                          | Marquez      |                       |                  |             |                                          | Study Coordinator                                       |                                                                                            |  |  |  |  |  |  |
| Catherine                         | Meza         |                       |                  |             |                                          | Study Coordinator                                       |                                                                                            |  |  |  |  |  |  |
| Shandel                           | Odom         |                       |                  |             |                                          | Study Coordinator                                       |                                                                                            |  |  |  |  |  |  |
| Makenna                           | Orel         |                       |                  |             |                                          | Study Coordinator                                       |                                                                                            |  |  |  |  |  |  |
| Shanna                            | Pselio       |                       |                  |             |                                          | Study Coordinator                                       |                                                                                            |  |  |  |  |  |  |
| Samuel                            | Penziner     |                       |                  |             |                                          | Sub-Investigator                                        |                                                                                            |  |  |  |  |  |  |
| Helen                             | Pu           |                       |                  |             |                                          | Study Coordinator                                       |                                                                                            |  |  |  |  |  |  |
| Kimberly                          | Quillin      |                       |                  |             |                                          | Pharmacist                                              |                                                                                            |  |  |  |  |  |  |
| Cesar                             | Ramirez      |                       |                  |             |                                          | Study Coordinator                                       |                                                                                            |  |  |  |  |  |  |
| Roxanna                           | Ramirez      |                       |                  |             |                                          | Study Coordinator                                       |                                                                                            |  |  |  |  |  |  |
| Monica                            | Salgado      |                       |                  |             |                                          | Study Coordinator                                       |                                                                                            |  |  |  |  |  |  |
| Marcy                             | Shores       |                       |                  |             |                                          | Study Coordinator                                       |                                                                                            |  |  |  |  |  |  |
| Raquel                            | Taitingfong  |                       |                  |             |                                          | Study Coordinator                                       |                                                                                            |  |  |  |  |  |  |
| Jennifer                          | Tande        |                       |                  |             |                                          | Study Coordinator                                       |                                                                                            |  |  |  |  |  |  |
| Van                               | Tuiletufuga  |                       |                  |             |                                          | Study Coordinator                                       |                                                                                            |  |  |  |  |  |  |
| Katrina                           | Tyler        |                       |                  |             |                                          | Study Coordinator                                       |                                                                                            |  |  |  |  |  |  |
| Linda                             | Vega         |                       |                  |             |                                          | Recruitment and Retention                               |                                                                                            |  |  |  |  |  |  |
| Karla                             | Zepeda       |                       |                  |             |                                          | Sub-Investigator                                        |                                                                                            |  |  |  |  |  |  |

Supplemental Online Content: Nonauthor Collaborators

\*Indicates required information. Only first name, last name, and suffix will appear in PubMed.

| *First Name and Middle Initial(s) | *Last Name | *Suffix (eg, Jr, III) | Academic Degrees | Institution | Location (city, state/province, country) | Role or Contribution, eg, chair, principal investigator | Group (if more than 1 Group listed in the byline) and/or Subgroup (eg, Steering Committee) |  |  |  |  |  |  |
|-----------------------------------|------------|-----------------------|------------------|-------------|------------------------------------------|---------------------------------------------------------|--------------------------------------------------------------------------------------------|--|--|--|--|--|--|
| Corey                             | Anderson   |                       |                  |             |                                          | Principal Investigator                                  |                                                                                            |  |  |  |  |  |  |
| Nikki                             | Carhill    |                       |                  |             |                                          | Data Management                                         |                                                                                            |  |  |  |  |  |  |
| Benjamin                          | Clark      |                       |                  |             |                                          | Sub-Investigator                                        |                                                                                            |  |  |  |  |  |  |
| Lisa                              | Dean       |                       |                  |             |                                          | Pharmacist                                              |                                                                                            |  |  |  |  |  |  |
| Naomi                             | Devine     |                       |                  |             |                                          | Sub-Investigator                                        |                                                                                            |  |  |  |  |  |  |
| Sophia                            | DiPeri     |                       |                  |             |                                          | Study Coordinator                                       |                                                                                            |  |  |  |  |  |  |
| Gladys                            | Espinal    |                       |                  |             |                                          | Ethics/Regulatory Contact                               |                                                                                            |  |  |  |  |  |  |
| Ronald                            | Hawkins    |                       |                  |             |                                          | Study Coordinator                                       |                                                                                            |  |  |  |  |  |  |
| Gabriela                          | Irra       |                       |                  |             |                                          | Study Coordinator                                       |                                                                                            |  |  |  |  |  |  |
| Angela                            | Ledezma    |                       |                  |             |                                          | Study Coordinator                                       |                                                                                            |  |  |  |  |  |  |
| Georgina                          | Lopez-Wood |                       |                  |             |                                          | Study Coordinator                                       |                                                                                            |  |  |  |  |  |  |
| Micaela                           | Luna       |                       |                  |             |                                          | Pharmacist                                              |                                                                                            |  |  |  |  |  |  |
| Wael                              | Mansour    |                       |                  |             |                                          | Recruitment and Retention                               |                                                                                            |  |  |  |  |  |  |
| Tasha                             | Marriott   |                       |                  |             |                                          | Sub-Investigator                                        |                                                                                            |  |  |  |  |  |  |
| Ashley                            | Perez      |                       |                  |             |                                          | Sub-Investigator                                        |                                                                                            |  |  |  |  |  |  |
| James                             | Ramsey     |                       |                  |             |                                          | Sub-Investigator                                        |                                                                                            |  |  |  |  |  |  |
| William                           | Reedy      |                       |                  |             |                                          | Sub-Investigator                                        |                                                                                            |  |  |  |  |  |  |
| Hannah                            | Spinks     |                       |                  |             |                                          | Pharmacist                                              |                                                                                            |  |  |  |  |  |  |
| Cecilia                           | Tanori     |                       |                  |             |                                          | Sub-Investigator                                        |                                                                                            |  |  |  |  |  |  |
| David                             | Tatelbaum  |                       |                  |             |                                          | Study Coordinator                                       |                                                                                            |  |  |  |  |  |  |
| Rudy                              | Vasquez    |                       |                  |             |                                          | Study Coordinator                                       |                                                                                            |  |  |  |  |  |  |
| Kim                               | Vasquez    |                       |                  |             |                                          | Study Coordinator                                       |                                                                                            |  |  |  |  |  |  |
| Jori                              | Vigil      |                       |                  |             |                                          | Study Coordinator                                       |                                                                                            |  |  |  |  |  |  |
| Isabel                            | Worthen    |                       |                  |             |                                          | Study Coordinator                                       |                                                                                            |  |  |  |  |  |  |
| Devin                             | Yu         |                       |                  |             |                                          | Study Coordinator                                       |                                                                                            |  |  |  |  |  |  |
| Jessica                           | Zuniga     |                       |                  |             |                                          | Study Coordinator                                       |                                                                                            |  |  |  |  |  |  |
| Patrick                           | Dennis     |                       |                  |             |                                          | Principal Investigator                                  |                                                                                            |  |  |  |  |  |  |
| Lauren                            | Alvarado   |                       |                  |             |                                          | Study Coordinator                                       |                                                                                            |  |  |  |  |  |  |
| Armand                            | Cox        |                       |                  |             |                                          | Study Coordinator                                       |                                                                                            |  |  |  |  |  |  |
| Victoria                          | Cullaro    |                       |                  |             |                                          | Regulatory Admin                                        |                                                                                            |  |  |  |  |  |  |
| John                              | Dunbar     |                       |                  |             |                                          | Study Coordinator, Primary                              |                                                                                            |  |  |  |  |  |  |
| Katherine                         | Giorlando  |                       |                  |             |                                          | Pharmacist                                              |                                                                                            |  |  |  |  |  |  |
| London                            | Hannan     |                       |                  |             |                                          | Pharmacist                                              |                                                                                            |  |  |  |  |  |  |
| Tyler                             | Hastings   |                       |                  |             |                                          | Pharmacist                                              |                                                                                            |  |  |  |  |  |  |
| Geoff                             | Hoskins    |                       |                  |             |                                          | Study Coordinator                                       |                                                                                            |  |  |  |  |  |  |
| Emily                             | Krambeck   |                       |                  |             |                                          | Study Coordinator                                       |                                                                                            |  |  |  |  |  |  |
| Juliana                           | Laurent    |                       |                  |             |                                          | Study Coordinator                                       |                                                                                            |  |  |  |  |  |  |
| Olga Michelle                     | Martinez   |                       |                  |             |                                          | Sub-Investigator                                        |                                                                                            |  |  |  |  |  |  |
| Reggie                            | Mister     |                       |                  |             |                                          | Ethics/Regulatory Contact                               |                                                                                            |  |  |  |  |  |  |
| Autumn                            | Moss       |                       |                  |             |                                          | Study Coordinator                                       |                                                                                            |  |  |  |  |  |  |

Supplemental Online Content: Nonauthor Collaborators

\*Indicates required information. Only first name, last name, and suffix will appear in PubMed.

| *First Name and Middle Initial(s) | *Last Name     | *Suffix (eg, Jr, III) | Academic Degrees | Institution | Location (city, state/province, country) | Role or Contribution, eg, chair, principal investigator | Group (if more than 1 Group listed in the byline) and/or Subgroup (eg, Steering Committee) |  |  |  |  |  |  |
|-----------------------------------|----------------|-----------------------|------------------|-------------|------------------------------------------|---------------------------------------------------------|--------------------------------------------------------------------------------------------|--|--|--|--|--|--|
| Margaret                          | Muli           |                       |                  |             |                                          | Study Coordinator                                       |                                                                                            |  |  |  |  |  |  |
| Nicolette                         | Quinn          |                       |                  |             |                                          | Sub-Investigator                                        |                                                                                            |  |  |  |  |  |  |
| Brittany                          | Reed           |                       |                  |             |                                          | Study Coordinator                                       |                                                                                            |  |  |  |  |  |  |
| Adam                              | Robinson       |                       |                  |             |                                          | Study Coordinator                                       |                                                                                            |  |  |  |  |  |  |
| Casey                             | Saavedra       |                       |                  |             |                                          | Sub-Investigator                                        |                                                                                            |  |  |  |  |  |  |
| Caitlin                           | Simon          |                       |                  |             |                                          | Study Coordinator                                       |                                                                                            |  |  |  |  |  |  |
| Derek                             | Smith          |                       |                  |             |                                          | Study Coordinator                                       |                                                                                            |  |  |  |  |  |  |
| Dylan                             | Touchet        |                       |                  |             |                                          | Study Coordinator                                       |                                                                                            |  |  |  |  |  |  |
| Annie                             | Wright         |                       |                  |             |                                          | Pharmacist                                              |                                                                                            |  |  |  |  |  |  |
|                                   |                |                       |                  |             |                                          |                                                         |                                                                                            |  |  |  |  |  |  |
| Miguel                            | Trevino        |                       |                  |             |                                          | Principal Investigator                                  |                                                                                            |  |  |  |  |  |  |
| Benjamin                          | DeVries        |                       |                  |             |                                          | Sub-Investigator                                        |                                                                                            |  |  |  |  |  |  |
| Sara                              | Allison-Hicks  |                       |                  |             |                                          | Recruiter                                               |                                                                                            |  |  |  |  |  |  |
| Timothy                           | Light          |                       |                  |             |                                          | Sub-Investigator                                        |                                                                                            |  |  |  |  |  |  |
| Wendy                             | Rubach         |                       |                  |             |                                          | Study Coordinator                                       |                                                                                            |  |  |  |  |  |  |
| Kimberly                          | Mai            |                       |                  |             |                                          | Study Coordinator                                       |                                                                                            |  |  |  |  |  |  |
| Tracey                            | Osborn         |                       |                  |             |                                          | Study Coordinator                                       |                                                                                            |  |  |  |  |  |  |
| Lori                              | Sheets         |                       |                  |             |                                          | Pharmacist                                              |                                                                                            |  |  |  |  |  |  |
| Dusty                             | Carver         |                       |                  |             |                                          | Lab Director                                            |                                                                                            |  |  |  |  |  |  |
| Alan                              | Reichman       |                       |                  |             |                                          | Principal Investigator                                  |                                                                                            |  |  |  |  |  |  |
| Djamchid                          | Lotfi          |                       |                  |             |                                          | Sub-Investigator                                        |                                                                                            |  |  |  |  |  |  |
| Nelson                            | Berrios        |                       |                  |             |                                          | Sub-Investigator                                        |                                                                                            |  |  |  |  |  |  |
| Sangeetha                         | Vulichi        |                       |                  |             |                                          | Sub-Investigator                                        |                                                                                            |  |  |  |  |  |  |
| Tulashi                           | Naguleswaran   |                       |                  |             |                                          | Study Coordinator                                       |                                                                                            |  |  |  |  |  |  |
| Yvonne                            | Subhan         |                       |                  |             |                                          | Study Coordinator                                       |                                                                                            |  |  |  |  |  |  |
| Monica                            | Rios           |                       |                  |             |                                          | Study Coordinator                                       |                                                                                            |  |  |  |  |  |  |
| Diana                             | Baron          |                       |                  |             |                                          | Study Coordinator                                       |                                                                                            |  |  |  |  |  |  |
| Abdul                             | Khowaja        |                       |                  |             |                                          | Study Coordinator                                       |                                                                                            |  |  |  |  |  |  |
| Siddharth                         | Nair           |                       |                  |             |                                          | Study Coordinator                                       |                                                                                            |  |  |  |  |  |  |
| Michael                           | Vicente        |                       |                  |             |                                          | Study Coordinator                                       |                                                                                            |  |  |  |  |  |  |
| Luvia Lizette                     | Gonzalez Gomez |                       |                  |             |                                          | Study Coordinator                                       |                                                                                            |  |  |  |  |  |  |
| Uriel Salvador                    | Acevedo Gomez  |                       |                  |             |                                          | Study Coordinator                                       |                                                                                            |  |  |  |  |  |  |
| Janak                             | Lamichhane     |                       |                  |             |                                          | Study Coordinator                                       |                                                                                            |  |  |  |  |  |  |
| Efe                               | Ekomod         |                       |                  |             |                                          | Study Coordinator                                       |                                                                                            |  |  |  |  |  |  |
| Akhila                            | Nair           |                       |                  |             |                                          | Study Coordinator                                       |                                                                                            |  |  |  |  |  |  |
| Shana                             | Maldonado      |                       |                  |             |                                          | Regulatory                                              |                                                                                            |  |  |  |  |  |  |
| Mobina                            | Naqvi          |                       |                  |             |                                          | Study Coordinator                                       |                                                                                            |  |  |  |  |  |  |
| Fahim                             | Dayani         |                       |                  |             |                                          | Site Administrator                                      |                                                                                            |  |  |  |  |  |  |
| Sontoshi                          | Patro          |                       |                  |             |                                          | Site Administrator                                      |                                                                                            |  |  |  |  |  |  |
| LubnaGazal                        | Golandaz       |                       |                  |             |                                          | Regulatory                                              |                                                                                            |  |  |  |  |  |  |



Supplemental Online Content: Nonauthor Collaborators

\*Indicates required information. Only first name, last name, and suffix will appear in PubMed.

| *First Name and Middle Initial(s) | *Last Name     | *Suffix (eg, Jr, III) | Academic Degrees | Institution | Location (city, state/province, country) | Role or Contribution, eg, chair, principal investigator | Group (if more than 1 Group listed in the byline) and/or Subgroup (eg, Steering Committee) |  |  |  |  |  |  |
|-----------------------------------|----------------|-----------------------|------------------|-------------|------------------------------------------|---------------------------------------------------------|--------------------------------------------------------------------------------------------|--|--|--|--|--|--|
| Amin                              | Jaka           |                       |                  |             |                                          | Regulatory                                              |                                                                                            |  |  |  |  |  |  |
| Santiago                          | Rios           |                       |                  |             |                                          | Pharmacist                                              |                                                                                            |  |  |  |  |  |  |
| Maushami                          | Gurung         |                       |                  |             |                                          | Pharmacist                                              |                                                                                            |  |  |  |  |  |  |
| Pratik                            | Gongloor       |                       |                  |             |                                          | Pharmacist                                              |                                                                                            |  |  |  |  |  |  |
| David                             | Coreas         |                       |                  |             |                                          | Pharmacist                                              |                                                                                            |  |  |  |  |  |  |
| Tarik                             | Demir          |                       |                  |             |                                          | Pharmacist                                              |                                                                                            |  |  |  |  |  |  |
| Zehra                             | Celik          |                       |                  |             |                                          | Pharmacist                                              |                                                                                            |  |  |  |  |  |  |
| Lora                              | McGill         |                       |                  |             |                                          | Principal Investigator                                  |                                                                                            |  |  |  |  |  |  |
| Lisa                              | Usdan          |                       |                  |             |                                          | Sub-Investigator                                        |                                                                                            |  |  |  |  |  |  |
| Valerie                           | Arnold         |                       |                  |             |                                          | Sub-Investigator                                        |                                                                                            |  |  |  |  |  |  |
| Keerthi                           | Heckle         |                       |                  |             |                                          | Sub-Investigator                                        |                                                                                            |  |  |  |  |  |  |
| Carolyn                           | Scatamacchia   |                       |                  |             |                                          | Sub-Investigator                                        |                                                                                            |  |  |  |  |  |  |
| Codi                              | Anthony        |                       |                  |             |                                          | Sub-Investigator                                        |                                                                                            |  |  |  |  |  |  |
| Carol                             | Marsh          |                       |                  |             |                                          | Study Coordinator                                       |                                                                                            |  |  |  |  |  |  |
| Jernell                           | Fair           |                       |                  |             |                                          | Study Coordinator                                       |                                                                                            |  |  |  |  |  |  |
| Anekeya                           | Stewart        |                       |                  |             |                                          | Study Coordinator                                       |                                                                                            |  |  |  |  |  |  |
| Rebecca                           | Hamlet         |                       |                  |             |                                          | Study Coordinator                                       |                                                                                            |  |  |  |  |  |  |
| Robyn                             | Presley        |                       |                  |             |                                          | Study Coordinator                                       |                                                                                            |  |  |  |  |  |  |
| Charles                           | Granberry      |                       |                  |             |                                          | Study Coordinator                                       |                                                                                            |  |  |  |  |  |  |
| Melissa                           | Flowers        |                       |                  |             |                                          | Study Coordinator                                       |                                                                                            |  |  |  |  |  |  |
| Cathy                             | Haupt          |                       |                  |             |                                          | Study Coordinator                                       |                                                                                            |  |  |  |  |  |  |
| Debra                             | O'Brien        |                       |                  |             |                                          | Study Coordinator                                       |                                                                                            |  |  |  |  |  |  |
| Kelsey                            | Evans          |                       |                  |             |                                          | Study Coordinator                                       |                                                                                            |  |  |  |  |  |  |
| Mary                              | Williams       |                       |                  |             |                                          | Study Coordinator                                       |                                                                                            |  |  |  |  |  |  |
| Julia                             | Sinatra        |                       |                  |             |                                          | Study Coordinator                                       |                                                                                            |  |  |  |  |  |  |
| Irene                             | Powell         |                       |                  |             |                                          | Lab                                                     |                                                                                            |  |  |  |  |  |  |
| Tavia                             | Flagg          |                       |                  |             |                                          | Lab                                                     |                                                                                            |  |  |  |  |  |  |
| LaKeshia                          | Pipkin         |                       |                  |             |                                          | RA/EDC                                                  |                                                                                            |  |  |  |  |  |  |
| Vanessa                           | Wheeler        |                       |                  |             |                                          | RA/IP/EDC                                               |                                                                                            |  |  |  |  |  |  |
| Erin                              | Wells          |                       |                  |             |                                          | Regulatory                                              |                                                                                            |  |  |  |  |  |  |
| Brandi                            | Gruber         |                       |                  |             |                                          | Regulatory/Recruitment                                  |                                                                                            |  |  |  |  |  |  |
| Amber                             | Jones          |                       |                  |             |                                          | Regulatory                                              |                                                                                            |  |  |  |  |  |  |
| Monica                            | Toor           |                       |                  |             |                                          | Recruitment                                             |                                                                                            |  |  |  |  |  |  |
| Kelly                             | Iskiwitz       |                       |                  |             |                                          | Site Management                                         |                                                                                            |  |  |  |  |  |  |
| Mia                               | Boyd           |                       |                  |             |                                          | Research Assistant                                      |                                                                                            |  |  |  |  |  |  |
| Sharneiseca                       | Epps           |                       |                  |             |                                          | Research Assistant                                      |                                                                                            |  |  |  |  |  |  |
|                                   |                |                       |                  |             |                                          |                                                         |                                                                                            |  |  |  |  |  |  |
| Frank                             | Cole           |                       |                  |             |                                          | Principal Investigator                                  |                                                                                            |  |  |  |  |  |  |
| Charlotte                         | Grayson-Mathis |                       |                  |             |                                          | Sub-Investigator                                        |                                                                                            |  |  |  |  |  |  |
| Maci                              | Web            |                       |                  |             |                                          | Sub-Investigator                                        |                                                                                            |  |  |  |  |  |  |

Supplemental Online Content: Nonauthor Collaborators

\*Indicates required information. Only first name, last name, and suffix will appear in PubMed.

| *First Name and Middle Initial(s) | *Last Name       | *Suffix (eg, Jr, III) | Academic Degrees | Institution | Location (city, state/province, country) | Role or Contribution, eg, chair, principal investigator | Group (if more than 1 Group listed in the byline) and/or Subgroup (eg, Steering Committee) |  |  |  |  |  |  |
|-----------------------------------|------------------|-----------------------|------------------|-------------|------------------------------------------|---------------------------------------------------------|--------------------------------------------------------------------------------------------|--|--|--|--|--|--|
| Catrina                           | Turner           |                       |                  |             |                                          | Sub-Investigator                                        |                                                                                            |  |  |  |  |  |  |
| Krystal                           | Reese            |                       |                  |             |                                          | Study Coordinator                                       |                                                                                            |  |  |  |  |  |  |
| Dana                              | Robinson         |                       |                  |             |                                          | Study Coordinator                                       |                                                                                            |  |  |  |  |  |  |
| Atira                             | Goodwin          |                       |                  |             |                                          | Study Coordinator                                       |                                                                                            |  |  |  |  |  |  |
| Kyle                              | Parker           |                       |                  |             |                                          | Study Coordinator                                       |                                                                                            |  |  |  |  |  |  |
| Chantelle                         | Ward             |                       |                  |             |                                          | Study Coordinator                                       |                                                                                            |  |  |  |  |  |  |
| Amber                             | Solomon          |                       |                  |             |                                          | Study Coordinator                                       |                                                                                            |  |  |  |  |  |  |
| Taylor                            | Lawson           |                       |                  |             |                                          | Study Coordinator                                       |                                                                                            |  |  |  |  |  |  |
| Marquita                          | Pledger          |                       |                  |             |                                          | Study Coordinator                                       |                                                                                            |  |  |  |  |  |  |
| Amanda                            | Lane Peterson    |                       |                  |             |                                          | Study Coordinator                                       |                                                                                            |  |  |  |  |  |  |
| Monique                           | Carignan         |                       |                  |             |                                          | Study Coordinator                                       |                                                                                            |  |  |  |  |  |  |
| David                             | Oguoma-Richards  |                       |                  |             |                                          | Study Coordinator                                       |                                                                                            |  |  |  |  |  |  |
| Stacy                             | Jones            |                       |                  |             |                                          | Study Coordinator                                       |                                                                                            |  |  |  |  |  |  |
| Kiara                             | McFarland-Head   |                       |                  |             |                                          | Research Nurse                                          |                                                                                            |  |  |  |  |  |  |
| Brittany                          | Bundeff          |                       |                  |             |                                          | Regulatory                                              |                                                                                            |  |  |  |  |  |  |
| Stephanie                         | Wojtowicz        |                       |                  |             |                                          | Regulatory                                              |                                                                                            |  |  |  |  |  |  |
| Cynthia                           | Holland          |                       |                  |             |                                          | Data Entry                                              |                                                                                            |  |  |  |  |  |  |
| Taylor                            | Sanders          |                       |                  |             |                                          | Principal Investigator                                  |                                                                                            |  |  |  |  |  |  |
| Lee                               | Simon            |                       |                  |             |                                          | Sub-Investigator                                        |                                                                                            |  |  |  |  |  |  |
| Caitlin                           | Lawrence         |                       |                  |             |                                          | Study Coordinator                                       |                                                                                            |  |  |  |  |  |  |
| Brittany                          | Bolton           |                       |                  |             |                                          | Study Coordinator                                       |                                                                                            |  |  |  |  |  |  |
| Kandice                           | Lemoine          |                       |                  |             |                                          | Study Coordinator                                       |                                                                                            |  |  |  |  |  |  |
| Kasey                             | Harris           |                       |                  |             |                                          | Study Coordinator                                       |                                                                                            |  |  |  |  |  |  |
| Hilary                            | Kingsley         |                       |                  |             |                                          | Study Coordinator                                       |                                                                                            |  |  |  |  |  |  |
| Reggie                            | Mister           |                       |                  |             |                                          | Regulatory                                              |                                                                                            |  |  |  |  |  |  |
| Danielle                          | Bryant           |                       |                  |             |                                          | Pharmacist                                              |                                                                                            |  |  |  |  |  |  |
| Geoff                             | Hoskins          |                       |                  |             |                                          | Contracts Contact                                       |                                                                                            |  |  |  |  |  |  |
| Victoria                          | Cullaro          |                       |                  |             |                                          | Regulatory                                              |                                                                                            |  |  |  |  |  |  |
| Korie                             | Clawson          |                       |                  |             |                                          | Regulatory                                              |                                                                                            |  |  |  |  |  |  |
| Colleen                           | Murphy           |                       |                  |             |                                          | Regulatory                                              |                                                                                            |  |  |  |  |  |  |
| Dale                              | Crawford Allison |                       |                  |             |                                          | Principal Investigator                                  |                                                                                            |  |  |  |  |  |  |
| Gregory                           | Newman           |                       |                  |             |                                          | Sub-Investigator                                        |                                                                                            |  |  |  |  |  |  |
| Dedra                             | Preece           |                       |                  |             |                                          | Study Coordinator                                       |                                                                                            |  |  |  |  |  |  |
| Pamela                            | Zook             |                       |                  |             |                                          | Study Coordinator                                       |                                                                                            |  |  |  |  |  |  |
| Taylor                            | Roznos           |                       |                  |             |                                          | Study Coordinator                                       |                                                                                            |  |  |  |  |  |  |
| Sharla                            | Russell          |                       |                  |             |                                          | Regulatory                                              |                                                                                            |  |  |  |  |  |  |
| Richard                           | Rodriguez        |                       |                  |             |                                          | Pharmacist                                              |                                                                                            |  |  |  |  |  |  |
| Angela                            | Roy              |                       |                  |             |                                          | Lab Supervisor                                          |                                                                                            |  |  |  |  |  |  |
|                                   |                  |                       |                  |             |                                          |                                                         |                                                                                            |  |  |  |  |  |  |
| Stacey                            | Layle            |                       |                  |             |                                          | Principal Investigator                                  |                                                                                            |  |  |  |  |  |  |

Supplemental Online Content: Nonauthor Collaborators

\*Indicates required information. Only first name, last name, and suffix will appear in PubMed.

| *First Name and Middle Initial(s) | *Last Name   | *Suffix (eg, Jr, III) | Academic Degrees | Institution | Location (city, state/province, country) | Role or Contribution, eg, chair, principal investigator | Group (if more than 1 Group listed in the byline) and/or Subgroup (eg, Steering Committee) |  |  |  |  |  |  |
|-----------------------------------|--------------|-----------------------|------------------|-------------|------------------------------------------|---------------------------------------------------------|--------------------------------------------------------------------------------------------|--|--|--|--|--|--|
| Purvi                             | Mehra        |                       |                  |             |                                          | Previous Principal Investigator                         |                                                                                            |  |  |  |  |  |  |
| Samantha                          | Bowen        |                       |                  |             |                                          | Sub-Investigator                                        |                                                                                            |  |  |  |  |  |  |
| Daniel                            | Johnson      |                       |                  |             |                                          | Sub-Investigator                                        |                                                                                            |  |  |  |  |  |  |
| Natalie                           | Guillen      |                       |                  |             |                                          | Study Coordinator                                       |                                                                                            |  |  |  |  |  |  |
| Sofia                             | Leone        |                       |                  |             |                                          | Study Coordinator                                       |                                                                                            |  |  |  |  |  |  |
| Guinevere                         | McCormick    |                       |                  |             |                                          | Study Coordinator                                       |                                                                                            |  |  |  |  |  |  |
| Laurel                            | Hermann      |                       |                  |             |                                          | Research Assistant                                      |                                                                                            |  |  |  |  |  |  |
| Lerner                            | Sarno        |                       |                  |             |                                          | Research Assistant                                      |                                                                                            |  |  |  |  |  |  |
| Taher                             | Abellatif    |                       |                  |             |                                          | Regulatory                                              |                                                                                            |  |  |  |  |  |  |
| Monica                            | Cleghorn     |                       |                  |             |                                          | Regulatory                                              |                                                                                            |  |  |  |  |  |  |
| Aya                               | Elansary     |                       |                  |             |                                          | Regulatory                                              |                                                                                            |  |  |  |  |  |  |
| Athalyah                          | Israel       |                       |                  |             |                                          | Regulatory                                              |                                                                                            |  |  |  |  |  |  |
| Michelle                          | Leeward      |                       |                  |             |                                          | Regulatory                                              |                                                                                            |  |  |  |  |  |  |
| Claudia                           | Parra        |                       |                  |             |                                          | Regulatory                                              |                                                                                            |  |  |  |  |  |  |
| Sydney                            | Harris       |                       |                  |             |                                          | Pharmacist                                              |                                                                                            |  |  |  |  |  |  |
| Prianka                           | Patel        |                       |                  |             |                                          | Patient Recruitment                                     |                                                                                            |  |  |  |  |  |  |
| Megan                             | Cawley       |                       |                  |             |                                          | IVRS User                                               |                                                                                            |  |  |  |  |  |  |
| Myrna                             | Castro       |                       |                  |             |                                          | EDC User                                                |                                                                                            |  |  |  |  |  |  |
|                                   |              |                       |                  |             |                                          |                                                         |                                                                                            |  |  |  |  |  |  |
| Tatyana                           | Miroshnikova |                       |                  |             |                                          | Principal Investigator                                  |                                                                                            |  |  |  |  |  |  |
| Michael                           | Dever        |                       |                  |             |                                          | Previous Principal Investigator                         |                                                                                            |  |  |  |  |  |  |
|                                   |              |                       |                  |             |                                          |                                                         |                                                                                            |  |  |  |  |  |  |
| Jorge                             | Venereo      |                       |                  |             |                                          | Principal Investigator                                  |                                                                                            |  |  |  |  |  |  |
| Henry                             | Paez         |                       |                  |             |                                          | Sub-Investigator                                        |                                                                                            |  |  |  |  |  |  |
| Andres                            | Isla         |                       |                  |             |                                          | Sub-Investigator                                        |                                                                                            |  |  |  |  |  |  |
| Yailin                            | Martin       |                       |                  |             |                                          | Pharmacist                                              |                                                                                            |  |  |  |  |  |  |
| Ana                               | Fernandez    |                       |                  |             |                                          | Main Study Coordinator                                  |                                                                                            |  |  |  |  |  |  |
| Isabel                            | Hernandez    |                       |                  |             |                                          | Start-up, Project Coord.                                |                                                                                            |  |  |  |  |  |  |
| Andrew                            | Isla Lavoy   |                       |                  |             |                                          | Regulatory                                              |                                                                                            |  |  |  |  |  |  |
| Nancy                             | Rios         |                       |                  |             |                                          | Laboratory Contact                                      |                                                                                            |  |  |  |  |  |  |
| Armando                           | Hernandez    |                       |                  |             |                                          | Budget/Contracts Contact                                |                                                                                            |  |  |  |  |  |  |
|                                   |              |                       |                  |             |                                          |                                                         |                                                                                            |  |  |  |  |  |  |
| Michael                           | Denberg      |                       |                  |             |                                          | Principal Investigator                                  |                                                                                            |  |  |  |  |  |  |
| Treacy                            | McTier       |                       |                  |             |                                          | Study Coordinator                                       |                                                                                            |  |  |  |  |  |  |
| Caroline                          | Reynolds     |                       |                  |             |                                          | Study Coordinator                                       |                                                                                            |  |  |  |  |  |  |
| Lacie                             | Thomas       |                       |                  |             |                                          | Study Coordinator                                       |                                                                                            |  |  |  |  |  |  |
| Connie                            | Eubanks      |                       |                  |             |                                          | Pharmacist                                              |                                                                                            |  |  |  |  |  |  |
| Tori                              | Oliver       |                       |                  |             |                                          | Pharmacist                                              |                                                                                            |  |  |  |  |  |  |
|                                   |              |                       |                  |             |                                          |                                                         |                                                                                            |  |  |  |  |  |  |
| Michael                           | Jacobs       |                       |                  |             |                                          | Principal Investigator                                  |                                                                                            |  |  |  |  |  |  |

Supplemental Online Content: Nonauthor Collaborators

\*Indicates required information. Only first name, last name, and suffix will appear in PubMed.

| *First Name and Middle Initial(s) | *Last Name       | *Suffix (eg, Jr, III) | Academic Degrees | Institution | Location (city, state/province, country) | Role or Contribution, eg, chair, principal investigator | Group (if more than 1 Group listed in the byline) and/or Subgroup (eg, Steering Committee) |  |  |  |  |  |  |
|-----------------------------------|------------------|-----------------------|------------------|-------------|------------------------------------------|---------------------------------------------------------|--------------------------------------------------------------------------------------------|--|--|--|--|--|--|
| Vincent                           | Mirkil           |                       |                  |             |                                          | Sub-Investigator                                        |                                                                                            |  |  |  |  |  |  |
| Kathleen                          | Menasche         |                       |                  |             |                                          | Sub-Investigator                                        |                                                                                            |  |  |  |  |  |  |
| Michael                           | Yee              |                       |                  |             |                                          | Sub-Investigator                                        |                                                                                            |  |  |  |  |  |  |
| Bonny                             | Alvarado Vasquez |                       |                  |             |                                          | Sub-Investigator                                        |                                                                                            |  |  |  |  |  |  |
| Candice                           | Garcia           |                       |                  |             |                                          | Pharmacist                                              |                                                                                            |  |  |  |  |  |  |
| Laura                             | Elio             |                       |                  |             |                                          | Sub-Investigator                                        |                                                                                            |  |  |  |  |  |  |
| Allan                             | Arenas           |                       |                  |             |                                          | Study Coordinator                                       |                                                                                            |  |  |  |  |  |  |
| Clarissa                          | Buena            |                       |                  |             |                                          | Study Coordinator                                       |                                                                                            |  |  |  |  |  |  |
| Cristina                          | Garcia           |                       |                  |             |                                          | Research Assisstant                                     |                                                                                            |  |  |  |  |  |  |
| Michael                           | Cannon           |                       |                  |             |                                          | Research Assisstant                                     |                                                                                            |  |  |  |  |  |  |
| Erin                              | Novotny          |                       |                  |             |                                          | Regulatory                                              |                                                                                            |  |  |  |  |  |  |
| Michelle                          | Oliver           |                       |                  |             |                                          | Regulatory                                              |                                                                                            |  |  |  |  |  |  |
| Amanda                            | Cannon           |                       |                  |             |                                          | Pharmacist                                              |                                                                                            |  |  |  |  |  |  |
| Mark                              | Gatdula          |                       |                  |             |                                          | Pharmacist                                              |                                                                                            |  |  |  |  |  |  |
| Cyn                               | Gillenwater      |                       |                  |             |                                          | EDC User                                                |                                                                                            |  |  |  |  |  |  |
| Adam                              | Rafi             |                       |                  |             |                                          | Principal Investigator                                  |                                                                                            |  |  |  |  |  |  |
| Wissam                            | Derian           |                       |                  |             |                                          | Previous Principal Investigator                         |                                                                                            |  |  |  |  |  |  |
| Miranda                           | Ramsey           |                       |                  |             |                                          | Study Coordinator                                       |                                                                                            |  |  |  |  |  |  |
| Evan                              | Culbreth         |                       |                  |             |                                          | Study Coordinator                                       |                                                                                            |  |  |  |  |  |  |
| Catherine                         | Fessler          |                       |                  |             |                                          | Study Coordinator                                       |                                                                                            |  |  |  |  |  |  |
| Kelly                             | Sorrill          |                       |                  |             |                                          | Study Coordinator                                       |                                                                                            |  |  |  |  |  |  |
|                                   |                  |                       |                  |             |                                          |                                                         |                                                                                            |  |  |  |  |  |  |
| Monica                            | Mauri            |                       |                  |             |                                          | Principal Investigator                                  |                                                                                            |  |  |  |  |  |  |
| Jeffrey                           | Rosen            |                       |                  |             |                                          | Old Principal Investigator                              |                                                                                            |  |  |  |  |  |  |
| Olga                              | Acosta           |                       |                  |             |                                          | Lab Manager                                             |                                                                                            |  |  |  |  |  |  |
| Walter                            | Brauchle         |                       |                  |             |                                          | Unblinded study coordinator                             |                                                                                            |  |  |  |  |  |  |
| Dadllany                          | Castaneda        |                       |                  |             |                                          | Unblinded study coordinator                             |                                                                                            |  |  |  |  |  |  |
| Maily                             | Castells         |                       |                  |             |                                          | Data entry                                              |                                                                                            |  |  |  |  |  |  |
| Daniela                           | Castro           |                       |                  |             |                                          | Study Coordinator                                       |                                                                                            |  |  |  |  |  |  |
| Maria Bibiana                     | Cespedes Laplace |                       |                  |             |                                          | Study Coordinator                                       |                                                                                            |  |  |  |  |  |  |
| Magdala                           | Flerisme         |                       |                  |             |                                          | Study Coordinator                                       |                                                                                            |  |  |  |  |  |  |
| Rocio                             | Garcia           |                       |                  |             |                                          | Unblinded study coordinator                             |                                                                                            |  |  |  |  |  |  |
| Julio                             | Gomez            |                       |                  |             |                                          | Clinical operation manager                              |                                                                                            |  |  |  |  |  |  |
| Michael                           | Hidalgo          |                       |                  |             |                                          | Sub-Investigator                                        |                                                                                            |  |  |  |  |  |  |
| Gabriela                          | Jimenez          |                       |                  |             |                                          | Study Coordinator                                       |                                                                                            |  |  |  |  |  |  |
| Miguel                            | Legon            |                       |                  |             |                                          | Study Coordinator                                       |                                                                                            |  |  |  |  |  |  |
| Victoria                          | Lella            |                       |                  |             |                                          | Study Coordinator                                       |                                                                                            |  |  |  |  |  |  |
| Kimany                            | Lemus            |                       |                  |             |                                          | Study Coordinator                                       |                                                                                            |  |  |  |  |  |  |
| Michelle                          | Oliver           |                       |                  |             |                                          | Regulatory Contact                                      |                                                                                            |  |  |  |  |  |  |
| Sheilla                           | Rico-Aramillo    |                       |                  |             |                                          | Study Coordinator                                       |                                                                                            |  |  |  |  |  |  |

Supplemental Online Content: Nonauthor Collaborators

\*Indicates required information. Only first name, last name, and suffix will appear in PubMed.

| *First Name and Middle Initial(s) | *Last Name  | *Suffix (eg, Jr, III) | Academic Degrees | Institution | Location (city, state/province, country) | Role or Contribution, eg, chair, principal investigator | Group (if more than 1 Group listed in the byline) and/or Subgroup (eg, Steering Committee) |  |  |  |  |  |  |
|-----------------------------------|-------------|-----------------------|------------------|-------------|------------------------------------------|---------------------------------------------------------|--------------------------------------------------------------------------------------------|--|--|--|--|--|--|
| Maria                             | Rodriguez   |                       |                  |             |                                          | Site Administrator                                      |                                                                                            |  |  |  |  |  |  |
| Yelida                            | Rodriguez   |                       |                  |             |                                          | Study Coordinator                                       |                                                                                            |  |  |  |  |  |  |
| Latisha                           | Salazar     |                       |                  |             |                                          | Data entry                                              |                                                                                            |  |  |  |  |  |  |
| Carlos                            | Santana     |                       |                  |             |                                          | Unblinded Study Coordinator                             |                                                                                            |  |  |  |  |  |  |
| Nelly                             | Tercero     |                       |                  |             |                                          | Study Coordinator                                       |                                                                                            |  |  |  |  |  |  |
| Earl E.                           | Martin      |                       |                  |             |                                          | Principal Investigator                                  |                                                                                            |  |  |  |  |  |  |
| Maria                             | Acevedo     |                       |                  |             |                                          | Study Coordinator                                       |                                                                                            |  |  |  |  |  |  |
| Amy                               | Anderson    |                       |                  |             |                                          | Study Coordinator                                       |                                                                                            |  |  |  |  |  |  |
| Talha                             | Baig        |                       |                  |             |                                          | Study Coordinator                                       |                                                                                            |  |  |  |  |  |  |
| Rana                              | Baker       |                       |                  |             |                                          | Ethics/Regulatory Contact                               |                                                                                            |  |  |  |  |  |  |
| Reemsha                           | Basrai      |                       |                  |             |                                          | Study Coordinator                                       |                                                                                            |  |  |  |  |  |  |
| Nora                              | Cabrera     |                       |                  |             |                                          | Study Coordinator                                       |                                                                                            |  |  |  |  |  |  |
| Cassidy                           | Caroll      |                       |                  |             |                                          | Study Coordinator                                       |                                                                                            |  |  |  |  |  |  |
| Shanika                           | Chatmon     |                       |                  |             |                                          | Study Coordinator                                       |                                                                                            |  |  |  |  |  |  |
| Sukhvinder                        | Cheema      |                       |                  |             |                                          | Study Coordinator                                       |                                                                                            |  |  |  |  |  |  |
| Anum                              | Chowdhry    |                       |                  |             |                                          | Study Coordinator                                       |                                                                                            |  |  |  |  |  |  |
| Nicole                            | Cordero     |                       |                  |             |                                          | Study Coordinator                                       |                                                                                            |  |  |  |  |  |  |
| Carolina                          | Deandres    |                       |                  |             |                                          | Sub-Investigator                                        |                                                                                            |  |  |  |  |  |  |
| Mounika                           | Deshpande   |                       |                  |             |                                          | Study Coordinator                                       |                                                                                            |  |  |  |  |  |  |
| Ambily                            | Dileep      |                       |                  |             |                                          | Ethics/Regulatory Contact                               |                                                                                            |  |  |  |  |  |  |
| Kimberly                          | Dolfi       |                       |                  |             |                                          | Study Coordinator                                       |                                                                                            |  |  |  |  |  |  |
| Lara                              | Eng         |                       |                  |             |                                          | Study Coordinator                                       |                                                                                            |  |  |  |  |  |  |
| Niccirria                         | Fountain    |                       |                  |             |                                          | Study Coordinator                                       |                                                                                            |  |  |  |  |  |  |
| Ramani                            | Gali        |                       |                  |             |                                          | Study Coordinator                                       |                                                                                            |  |  |  |  |  |  |
| Adrienne                          | Hernandez   |                       |                  |             |                                          | Study Coordinator                                       |                                                                                            |  |  |  |  |  |  |
| Arsani                            | Iskandar    |                       |                  |             |                                          | Study Coordinator                                       |                                                                                            |  |  |  |  |  |  |
| Riaz                              | Khan        |                       |                  |             |                                          | Study Coordinator                                       |                                                                                            |  |  |  |  |  |  |
| Adrianna                          | Knight      |                       |                  |             |                                          | Study Coordinator                                       |                                                                                            |  |  |  |  |  |  |
| Soni                              | Kundapati   |                       |                  |             |                                          | Study Coordinator                                       |                                                                                            |  |  |  |  |  |  |
| Irma                              | Lobo        |                       |                  |             |                                          | Study Coordinator                                       |                                                                                            |  |  |  |  |  |  |
| Zahra                             | Lokhandwala |                       |                  |             |                                          | Study Coordinator                                       |                                                                                            |  |  |  |  |  |  |
| Zara                              | Lokhandwala |                       |                  |             |                                          | Study Coordinator                                       |                                                                                            |  |  |  |  |  |  |
| Faryal                            | Mahmood     |                       |                  |             |                                          | Study Coordinator                                       |                                                                                            |  |  |  |  |  |  |
| Rifa                              | Marediya    |                       |                  |             |                                          | Study Coordinator                                       |                                                                                            |  |  |  |  |  |  |
| Earl F                            | Martin      |                       |                  |             |                                          | Sub-Investigator                                        |                                                                                            |  |  |  |  |  |  |
| Mirella                           | Melendez    |                       |                  |             |                                          | Study Coordinator                                       |                                                                                            |  |  |  |  |  |  |
| Asfand                            | Moosa       |                       |                  |             |                                          | Study Coordinator                                       |                                                                                            |  |  |  |  |  |  |
| Alefiyah                          | Motiwala    |                       |                  |             |                                          | Ethics/Regulatory Contact                               |                                                                                            |  |  |  |  |  |  |
| Shamnun                           | Muhebb      |                       |                  |             |                                          | Study Coordinator                                       |                                                                                            |  |  |  |  |  |  |
| Monica                            | Murray      |                       |                  |             |                                          | Sub-Investigator                                        |                                                                                            |  |  |  |  |  |  |

Supplemental Online Content: Nonauthor Collaborators

\*Indicates required information. Only first name, last name, and suffix will appear in PubMed.

| *First Name and Middle Initial(s) | *Last Name    | *Suffix (eg, Jr, III) | Academic Degrees | Institution | Location (city, state/province, country) | Role or Contribution, eg, chair, principal investigator | Group (if more than 1 Group listed in the byline) and/or Subgroup (eg, Steering Committee) |  |  |  |  |  |  |
|-----------------------------------|---------------|-----------------------|------------------|-------------|------------------------------------------|---------------------------------------------------------|--------------------------------------------------------------------------------------------|--|--|--|--|--|--|
| Muneeb                            | Rehman        |                       |                  |             |                                          | Study Coordinator                                       |                                                                                            |  |  |  |  |  |  |
| Ariel                             | Rivera        |                       |                  |             |                                          | Research Assistant                                      |                                                                                            |  |  |  |  |  |  |
| Ashay                             | Shah          |                       |                  |             |                                          | Study Coordinator                                       |                                                                                            |  |  |  |  |  |  |
| Sara                              | Solorzano     |                       |                  |             |                                          | Study Coordinator                                       |                                                                                            |  |  |  |  |  |  |
| Laila                             | Somani        |                       |                  |             |                                          | Study Coordinator                                       |                                                                                            |  |  |  |  |  |  |
| Loreta                            | Soneira       |                       |                  |             |                                          | Study Coordinator                                       |                                                                                            |  |  |  |  |  |  |
| Amy                               | Starr         |                       |                  |             |                                          | Sub-Investigator                                        |                                                                                            |  |  |  |  |  |  |
| Danielle                          | Thompson      |                       |                  |             |                                          | Study Coordinator                                       |                                                                                            |  |  |  |  |  |  |
| Andrea                            | Torres        |                       |                  |             |                                          | research Assistant                                      |                                                                                            |  |  |  |  |  |  |
| Elizabeth                         | Tran          |                       |                  |             |                                          | Study Coordinator                                       |                                                                                            |  |  |  |  |  |  |
| Mohammad Ali                      | Ullah         |                       |                  |             |                                          | Study Coordinator                                       |                                                                                            |  |  |  |  |  |  |
| Allie                             | Valentine     |                       |                  |             |                                          | Ethics/Regulatory Contact                               |                                                                                            |  |  |  |  |  |  |
| Laura                             | Vaquerano     |                       |                  |             |                                          | Study Coordinator                                       |                                                                                            |  |  |  |  |  |  |
| Amanda                            | Yake          |                       |                  |             |                                          | Study Coordinator                                       |                                                                                            |  |  |  |  |  |  |
| Yousra                            | Yousif        |                       |                  |             |                                          | Study Coordinator                                       |                                                                                            |  |  |  |  |  |  |
| Ashley                            | Zaldivar      |                       |                  |             |                                          | Research Assistant                                      |                                                                                            |  |  |  |  |  |  |
|                                   |               |                       |                  |             |                                          |                                                         |                                                                                            |  |  |  |  |  |  |
| William                           | Byars         |                       |                  |             |                                          | Principal Investigator                                  |                                                                                            |  |  |  |  |  |  |
| Hillary                           | Brown         |                       |                  |             |                                          | Study Coordinator                                       |                                                                                            |  |  |  |  |  |  |
| Anne                              | Claire Gaskin |                       |                  |             |                                          | Sub-Investigator                                        |                                                                                            |  |  |  |  |  |  |
| Caitlynn                          | Clayton       |                       |                  |             |                                          | Study Coordinator                                       |                                                                                            |  |  |  |  |  |  |
| Christopher                       | Davis         |                       |                  |             |                                          | Sub-Investigator                                        |                                                                                            |  |  |  |  |  |  |
| Sydney                            | Dillon        |                       |                  |             |                                          | Study Coordinator                                       |                                                                                            |  |  |  |  |  |  |
| Belinda                           | Driggers      |                       |                  |             |                                          | Lab Technician                                          |                                                                                            |  |  |  |  |  |  |
| Anfernee                          | Ferrell       |                       |                  |             |                                          | Data Management                                         |                                                                                            |  |  |  |  |  |  |
| Danielle Elizabeth                | Green         |                       |                  |             |                                          | Study Coordinator                                       |                                                                                            |  |  |  |  |  |  |
| Lisa                              | Hunt          |                       |                  |             |                                          | Study Coordinator                                       |                                                                                            |  |  |  |  |  |  |
| Cathleen                          | Jeffers       |                       |                  |             |                                          | Sub-Investigator                                        |                                                                                            |  |  |  |  |  |  |
| Cindy                             | Kirkland      |                       |                  |             |                                          | Ethics/Regulatory Contact                               |                                                                                            |  |  |  |  |  |  |
| Lina                              | Lopez         |                       |                  |             |                                          | Study Coordinator                                       |                                                                                            |  |  |  |  |  |  |
| Ronald                            | Mayfield      |                       |                  |             |                                          | Sub-Investigator                                        |                                                                                            |  |  |  |  |  |  |
| Carole                            | Mercer        |                       |                  |             |                                          | Sub-Investigator                                        |                                                                                            |  |  |  |  |  |  |
| Kathy                             | Parsons       |                       |                  |             |                                          | Study Coordinator                                       |                                                                                            |  |  |  |  |  |  |
| Sharon                            | Patton        |                       |                  |             |                                          | Study Coordinator                                       |                                                                                            |  |  |  |  |  |  |
| Kayla                             | Puck          |                       |                  |             |                                          | Study Coordinator                                       |                                                                                            |  |  |  |  |  |  |
| Lina                              | Restrepo      |                       |                  |             |                                          | Study Coordinator                                       |                                                                                            |  |  |  |  |  |  |
| Tanya                             | Sheppard      |                       |                  |             |                                          | Study Coordinator                                       |                                                                                            |  |  |  |  |  |  |
| Gina                              | Teachman      |                       |                  |             |                                          | Study Coordinator                                       |                                                                                            |  |  |  |  |  |  |
| Jessica                           | Velez         |                       |                  |             |                                          | Study Coordinator                                       |                                                                                            |  |  |  |  |  |  |
| Amanda                            | Whitehead     |                       |                  |             |                                          | Administrator                                           |                                                                                            |  |  |  |  |  |  |

Supplemental Online Content: Nonauthor Collaborators

\*Indicates required information. Only first name, last name, and suffix will appear in PubMed.

| *First Name and Middle Initial(s) | *Last Name     | *Suffix (eg, Jr, III) | Academic Degrees | Institution | Location (city, state/province, country) | Role or Contribution, eg, chair, principal investigator | Group (if more than 1 Group listed in the byline) and/or Subgroup (eg, Steering Committee) |  |  |  |  |  |  |
|-----------------------------------|----------------|-----------------------|------------------|-------------|------------------------------------------|---------------------------------------------------------|--------------------------------------------------------------------------------------------|--|--|--|--|--|--|
| Mahendra                          | Jain           |                       |                  |             |                                          | Principal Investigator                                  |                                                                                            |  |  |  |  |  |  |
| Gloria                            | Asanji         |                       |                  |             |                                          | Study Nurse                                             |                                                                                            |  |  |  |  |  |  |
| Jennifer                          | Garrett        |                       |                  |             |                                          | Study Coordinator                                       |                                                                                            |  |  |  |  |  |  |
| Katie                             | Gill           |                       |                  |             |                                          | Study Coordinator                                       |                                                                                            |  |  |  |  |  |  |
| DeAndrea                          | Hester         |                       |                  |             |                                          | Study Coordinator                                       |                                                                                            |  |  |  |  |  |  |
| Bela                              | Jain           |                       |                  |             |                                          | Pharmacist                                              |                                                                                            |  |  |  |  |  |  |
| Yvette                            | Mitchell       |                       |                  |             |                                          | Study Coordinator                                       |                                                                                            |  |  |  |  |  |  |
| Teresa                            | Becker         |                       |                  |             |                                          | Principal Investigator                                  |                                                                                            |  |  |  |  |  |  |
| Cecilia                           | McKeown-Biagas |                       |                  |             |                                          | Sub-Investigator                                        |                                                                                            |  |  |  |  |  |  |
| Veronica                          | Fragoso        |                       |                  |             |                                          | Sub-Investigator                                        |                                                                                            |  |  |  |  |  |  |
| Lisa                              | Holloway       |                       |                  |             |                                          | Sub-Investigator                                        |                                                                                            |  |  |  |  |  |  |
| Tracy                             | Kowalski       |                       |                  |             |                                          | Sub-Investigator                                        |                                                                                            |  |  |  |  |  |  |
| Shakira                           | Barr           |                       |                  |             |                                          | Sub-Investigator                                        |                                                                                            |  |  |  |  |  |  |
| Bonnie                            | Colville       |                       |                  |             |                                          | Sub-Investigator                                        |                                                                                            |  |  |  |  |  |  |
| Chen-Ho                           | Yang           |                       |                  |             |                                          | Sub-Investigator                                        |                                                                                            |  |  |  |  |  |  |
| Danitra                           | Glasper        |                       |                  |             |                                          | Sub-Investigator                                        |                                                                                            |  |  |  |  |  |  |
| Allan                             | Phuah          |                       |                  |             |                                          | Sub-Investigator                                        |                                                                                            |  |  |  |  |  |  |
| Vicki                             | Miller         |                       |                  |             |                                          | Sub-Investigator                                        |                                                                                            |  |  |  |  |  |  |
| Sheila                            | Schmidt        |                       |                  |             |                                          | Sub-Investigator                                        |                                                                                            |  |  |  |  |  |  |
| Amy                               | Anderson       |                       |                  |             |                                          | Pharmacist                                              |                                                                                            |  |  |  |  |  |  |
| Ashrat                            | Jafri          |                       |                  |             |                                          | Pharmacist                                              |                                                                                            |  |  |  |  |  |  |
| Waheeda                           | Sureshbabu     |                       |                  |             |                                          | Pharmacist                                              |                                                                                            |  |  |  |  |  |  |
| Leena                             | Mir            |                       |                  |             |                                          | Pharmacist                                              |                                                                                            |  |  |  |  |  |  |
| Stuti                             | Sharma         |                       |                  |             |                                          | Pharmacist                                              |                                                                                            |  |  |  |  |  |  |
| Saja                              | Asaad          |                       |                  |             |                                          | Pharmacist                                              |                                                                                            |  |  |  |  |  |  |
| Muhammad                          | Hasnain        |                       |                  |             |                                          | Pharmacist                                              |                                                                                            |  |  |  |  |  |  |
| Tru                               | Ngo            |                       |                  |             |                                          | Pharmacist                                              |                                                                                            |  |  |  |  |  |  |
| Devi                              | Hari           |                       |                  |             |                                          | Pharmacist                                              |                                                                                            |  |  |  |  |  |  |
| Ikenna                            | Oheri          |                       |                  |             |                                          | Pharmacist                                              |                                                                                            |  |  |  |  |  |  |
| Asma                              | Patwary        |                       |                  |             |                                          | Pharmacist                                              |                                                                                            |  |  |  |  |  |  |
| Mahmoud                           | Mohamed        |                       |                  |             |                                          | Pharmacist                                              |                                                                                            |  |  |  |  |  |  |
| Priscilla                         | Hernandez      |                       |                  |             |                                          | Pharmacist                                              |                                                                                            |  |  |  |  |  |  |
| Jonatan                           | Gioia          |                       |                  |             |                                          | Study Coordinator                                       |                                                                                            |  |  |  |  |  |  |
| Abdeali                           | Dalal          |                       |                  |             |                                          | Study Coordinator                                       |                                                                                            |  |  |  |  |  |  |
| Pauline                           | Ngban          |                       |                  |             |                                          | Study Coordinator                                       |                                                                                            |  |  |  |  |  |  |
| Sandra                            | Smith          |                       |                  |             |                                          | Study Coordinator                                       |                                                                                            |  |  |  |  |  |  |
| Bernardo                          | Martinez Leal  |                       |                  |             |                                          | Study Coordinator                                       |                                                                                            |  |  |  |  |  |  |
| Akram                             | Assaf          |                       |                  |             |                                          | Study Coordinator                                       |                                                                                            |  |  |  |  |  |  |
| Alondra                           | Martinez       |                       |                  |             |                                          | Study Coordinator                                       |                                                                                            |  |  |  |  |  |  |
| Loreta                            | Soneira        |                       |                  |             |                                          | Study Coordinator                                       |                                                                                            |  |  |  |  |  |  |

Supplemental Online Content: Nonauthor Collaborators

\*Indicates required information. Only first name, last name, and suffix will appear in PubMed.

| *First Name and Middle Initial(s) | *Last Name     | *Suffix (eg, Jr, III) | Academic Degrees | Institution | Location (city, state/province, country) | Role or Contribution, eg, chair, principal investigator | Group (if more than 1 Group listed in the byline) and/or Subgroup (eg, Steering Committee) |  |  |  |  |  |  |
|-----------------------------------|----------------|-----------------------|------------------|-------------|------------------------------------------|---------------------------------------------------------|--------------------------------------------------------------------------------------------|--|--|--|--|--|--|
| Khola                             | Khan           |                       |                  |             |                                          | Study Coordinator                                       |                                                                                            |  |  |  |  |  |  |
| Jacqueline                        | Castello       |                       |                  |             |                                          | Study Coordinator                                       |                                                                                            |  |  |  |  |  |  |
| Mariya                            | Potapenko      |                       |                  |             |                                          | Study Coordinator                                       |                                                                                            |  |  |  |  |  |  |
| Zurzar                            | Wahaj          |                       |                  |             |                                          | Study Coordinator                                       |                                                                                            |  |  |  |  |  |  |
| Faris                             | Elmachtoub     |                       |                  |             |                                          | Study Coordinator                                       |                                                                                            |  |  |  |  |  |  |
| Amna                              | Akhtar         |                       |                  |             |                                          | Data Coordinator                                        |                                                                                            |  |  |  |  |  |  |
| Muhammad                          | Areeb Siddiqui |                       |                  |             |                                          | Data Coordinator                                        |                                                                                            |  |  |  |  |  |  |
| Maira                             | Jamal          |                       |                  |             |                                          | Data Coordinator                                        |                                                                                            |  |  |  |  |  |  |
| Faryal                            | Mahmood        |                       |                  |             |                                          | Data Coordinator                                        |                                                                                            |  |  |  |  |  |  |
| Mohammad                          | Rizvi          |                       |                  |             |                                          | Data Coordinator                                        |                                                                                            |  |  |  |  |  |  |
| Karina                            | Sainz          |                       |                  |             |                                          | Data Coordinator                                        |                                                                                            |  |  |  |  |  |  |
| Sarah                             | Lucky-Dania    |                       |                  |             |                                          | Data Coordinator                                        |                                                                                            |  |  |  |  |  |  |
| Stacy                             | Villarreal     |                       |                  |             |                                          | Data Coordinator                                        |                                                                                            |  |  |  |  |  |  |
| William                           | Fernandez      |                       |                  |             |                                          | Data Coordinator                                        |                                                                                            |  |  |  |  |  |  |
| Shamarrian                        | Hampton        |                       |                  |             |                                          | Data Coordinator                                        |                                                                                            |  |  |  |  |  |  |
| Jerry                             | Bellamy        |                       |                  |             |                                          | Research Assistant                                      |                                                                                            |  |  |  |  |  |  |
| Lonisha                           | Brown          |                       |                  |             |                                          | Research Assistant                                      |                                                                                            |  |  |  |  |  |  |
| Evan                              | Doran          |                       |                  |             |                                          | Research Assistant                                      |                                                                                            |  |  |  |  |  |  |
| Eduardo                           | Manzanares     |                       |                  |             |                                          | Research Assistant                                      |                                                                                            |  |  |  |  |  |  |
| James                             | Palmer         |                       |                  |             |                                          | Research Assistant                                      |                                                                                            |  |  |  |  |  |  |
| Aaron                             | Sanders        |                       |                  |             |                                          | Research Assistant                                      |                                                                                            |  |  |  |  |  |  |
| Faraya                            | Bokhari        |                       |                  |             |                                          | Research Assistant                                      |                                                                                            |  |  |  |  |  |  |
| Omowunmi                          | Fenuyi         |                       |                  |             |                                          | Research Assistant                                      |                                                                                            |  |  |  |  |  |  |
| Clarissia                         | Greer          |                       |                  |             |                                          | Research Assistant                                      |                                                                                            |  |  |  |  |  |  |
| Hansol                            | Jang           |                       |                  |             |                                          | Research Assistant                                      |                                                                                            |  |  |  |  |  |  |
| Andrea                            | Juanillo       |                       |                  |             |                                          | Research Assistant                                      |                                                                                            |  |  |  |  |  |  |
| Crystal                           | Reese          |                       |                  |             |                                          | Research Assistant                                      |                                                                                            |  |  |  |  |  |  |
| Dheeraj                           | Narla          |                       |                  |             |                                          | Research Assistant                                      |                                                                                            |  |  |  |  |  |  |
| Ijeoma                            | Okoko          |                       |                  |             |                                          | Research Assistant                                      |                                                                                            |  |  |  |  |  |  |
| Cara                              | Woodham        |                       |                  |             |                                          | Research Assistant                                      |                                                                                            |  |  |  |  |  |  |
| Ambily                            | Dileep         |                       |                  |             |                                          | Ethics/Regulatory Contact                               |                                                                                            |  |  |  |  |  |  |
| Rose                              | Eaton          |                       |                  |             |                                          | Ethics/Regulatory Contact                               |                                                                                            |  |  |  |  |  |  |
| Shariqa                           | Khawaja        |                       |                  |             |                                          | Ethics/Regulatory Contact                               |                                                                                            |  |  |  |  |  |  |
| Mirella                           | Melendez       |                       |                  |             |                                          | Ethics/Regulatory Contact                               |                                                                                            |  |  |  |  |  |  |
| Tehreem                           | Mushtag        |                       |                  |             |                                          | Ethics/Regulatory Contact                               |                                                                                            |  |  |  |  |  |  |
| Asifa                             | Nisar Bhutto   |                       |                  |             |                                          | Ethics/Regulatory Contact                               |                                                                                            |  |  |  |  |  |  |
| Sara                              | Solorsano      |                       |                  |             |                                          | Ethics/Regulatory Contact                               |                                                                                            |  |  |  |  |  |  |
| Allie                             | Valentine      |                       |                  |             |                                          | Ethics/Regulatory Contact                               |                                                                                            |  |  |  |  |  |  |
| Sajeel                            | Ahmed          |                       |                  |             |                                          | Regulatory Coordinator                                  |                                                                                            |  |  |  |  |  |  |
| Rabia                             | Shamim         |                       |                  |             |                                          | Regulatory Coordinator                                  |                                                                                            |  |  |  |  |  |  |



Supplemental Online Content: Nonauthor Collaborators

\*Indicates required information. Only first name, last name, and suffix will appear in PubMed.

| *First Name and Middle Initial(s) | *Last Name | *Suffix (eg, Jr, III) | Academic Degrees | Institution | Location (city, state/province, country) | Role or Contribution, eg, chair, principal investigator | Group (if more than 1 Group listed in the byline) and/or Subgroup (eg, Steering Committee) |  |  |  |  |  |  |
|-----------------------------------|------------|-----------------------|------------------|-------------|------------------------------------------|---------------------------------------------------------|--------------------------------------------------------------------------------------------|--|--|--|--|--|--|
| Norma                             | Gonzalez   |                       |                  |             |                                          | Regulatory Specialist                                   |                                                                                            |  |  |  |  |  |  |
| Felicia                           | Ardoin     |                       |                  |             |                                          | Lab Technician                                          |                                                                                            |  |  |  |  |  |  |
| Joshua                            | Moore      |                       |                  |             |                                          | Lab Technician                                          |                                                                                            |  |  |  |  |  |  |
| Nina                              | Nuncio     |                       |                  |             |                                          | Lab Technician                                          |                                                                                            |  |  |  |  |  |  |
| Eric                              | Ray        |                       |                  |             |                                          | Lab Technician                                          |                                                                                            |  |  |  |  |  |  |
| Kara                              | Sikes      |                       |                  |             |                                          | Lab Technician                                          |                                                                                            |  |  |  |  |  |  |
| Imani                             | Troutman   |                       |                  |             |                                          | Lab Technician                                          |                                                                                            |  |  |  |  |  |  |
| Natasha                           | West       |                       |                  |             |                                          | Lab Technician                                          |                                                                                            |  |  |  |  |  |  |
| Quiana                            | Wilson     |                       |                  |             |                                          | Lab Technician                                          |                                                                                            |  |  |  |  |  |  |
| Nikisha                           | Young      |                       |                  |             |                                          | Lab Technician                                          |                                                                                            |  |  |  |  |  |  |
| Misbah                            | Baloch     |                       |                  |             |                                          | EDC User                                                |                                                                                            |  |  |  |  |  |  |
| Najmuddin                         | Karimjee   |                       |                  |             |                                          | Principal Investigator                                  |                                                                                            |  |  |  |  |  |  |
| Kristy                            | Carroll    |                       |                  |             |                                          | Sub-Investigator                                        |                                                                                            |  |  |  |  |  |  |
| Sakina                            | Broachwala |                       |                  |             |                                          | Sub-Investigator                                        |                                                                                            |  |  |  |  |  |  |
| Natalee                           | Calais     |                       |                  |             |                                          | Sub-Investigator                                        |                                                                                            |  |  |  |  |  |  |
| Jessica                           | Laabs      |                       |                  |             |                                          | Sub-Investigator                                        |                                                                                            |  |  |  |  |  |  |
| Karen                             | Marler     |                       |                  |             |                                          | Sub-Investigator                                        |                                                                                            |  |  |  |  |  |  |
| Samana                            | Rizvi      |                       |                  |             |                                          | Study Coordinator                                       |                                                                                            |  |  |  |  |  |  |
| Amar                              | Syed       |                       |                  |             |                                          | Study Coordinator                                       |                                                                                            |  |  |  |  |  |  |
| Narjis                            | Syed       |                       |                  |             |                                          | Study Coordinator                                       |                                                                                            |  |  |  |  |  |  |
| Zamir                             | Rizvi      |                       |                  |             |                                          | Pharmacist                                              |                                                                                            |  |  |  |  |  |  |
| Zohair                            | Hariwala   |                       |                  |             |                                          | Payment Contact                                         |                                                                                            |  |  |  |  |  |  |
| Patty                             | Gloyd      |                       |                  |             |                                          | Ethics/Regulatory Contact                               |                                                                                            |  |  |  |  |  |  |
| Abid                              | Rizvi      |                       |                  |             |                                          | Study Coordinator                                       |                                                                                            |  |  |  |  |  |  |
|                                   |            |                       |                  |             |                                          |                                                         |                                                                                            |  |  |  |  |  |  |
| Benjamin                          | Marcum     |                       |                  |             |                                          | Principal Investigator                                  |                                                                                            |  |  |  |  |  |  |
| Joshua                            | Carswell   |                       |                  |             |                                          | Sub-Investigator                                        |                                                                                            |  |  |  |  |  |  |
| Cortney                           | Fanning    |                       |                  |             |                                          | Sub-Investigator                                        |                                                                                            |  |  |  |  |  |  |
| Lesslie                           | Bull       |                       |                  |             |                                          | Sub-Investigator                                        |                                                                                            |  |  |  |  |  |  |
| Peter                             | Corta      |                       |                  |             |                                          | Sub-Investigator                                        |                                                                                            |  |  |  |  |  |  |
| Holly                             | James      |                       |                  |             |                                          | Study Coordinator                                       |                                                                                            |  |  |  |  |  |  |
| David                             | Martinez   |                       |                  |             |                                          | Study Coordinator                                       |                                                                                            |  |  |  |  |  |  |
| Robin                             | Scurlark   |                       |                  |             |                                          | Study Coordinator                                       |                                                                                            |  |  |  |  |  |  |
| Stephanie                         | Elliott    |                       |                  |             |                                          | Study Coordinator                                       |                                                                                            |  |  |  |  |  |  |
| Sydney                            | Beck       |                       |                  |             |                                          | Study Coordinator                                       |                                                                                            |  |  |  |  |  |  |
| Cayla                             | Beck       |                       |                  |             |                                          | Study Coordinator                                       |                                                                                            |  |  |  |  |  |  |
| Sarah                             | Glover     |                       |                  |             |                                          | Study Coordinator                                       |                                                                                            |  |  |  |  |  |  |
| Jasmine                           | Bonson     |                       |                  |             |                                          | Study Coordinator                                       |                                                                                            |  |  |  |  |  |  |
| Tanisha                           | Patel      |                       |                  |             |                                          | Study Coordinator                                       |                                                                                            |  |  |  |  |  |  |
| Garrett                           | Matthew    |                       |                  |             |                                          | Study Coordinator                                       |                                                                                            |  |  |  |  |  |  |

Supplemental Online Content: Nonauthor Collaborators

\*Indicates required information. Only first name, last name, and suffix will appear in PubMed.

| *First Name and Middle Initial(s) | *Last Name     | *Suffix (eg, Jr, III) | Academic Degrees | Institution | Location (city, state/province, country) | Role or Contribution, eg, chair, principal investigator | Group (if more than 1 Group listed in the byline) and/or Subgroup (eg, Steering Committee) |  |  |  |  |  |  |
|-----------------------------------|----------------|-----------------------|------------------|-------------|------------------------------------------|---------------------------------------------------------|--------------------------------------------------------------------------------------------|--|--|--|--|--|--|
| Kyla                              | Davidoff       |                       |                  |             |                                          | Site Contract Contact                                   |                                                                                            |  |  |  |  |  |  |
| Jim                               | Vesely         |                       |                  |             |                                          | Site Contract Contact                                   |                                                                                            |  |  |  |  |  |  |
| Cyrus                             | Horton         |                       |                  |             |                                          | Budget/Contracts Contact                                |                                                                                            |  |  |  |  |  |  |
| Rebecca                           | Barbour        |                       |                  |             |                                          | Site Contract Contact                                   |                                                                                            |  |  |  |  |  |  |
| Isabel                            | Pereira        |                       |                  |             |                                          | Principal Investigator                                  |                                                                                            |  |  |  |  |  |  |
| Gina                              | Rivero         |                       |                  |             |                                          | Pharmacist                                              |                                                                                            |  |  |  |  |  |  |
| Denise                            | Alston         |                       |                  |             |                                          | Pharmacist                                              |                                                                                            |  |  |  |  |  |  |
| Paulina                           | Miller         |                       |                  |             |                                          | Study Coordinator                                       |                                                                                            |  |  |  |  |  |  |
| Frances                           | Downing        |                       |                  |             |                                          | Study Coordinator                                       |                                                                                            |  |  |  |  |  |  |
| Nelia                             | Sanchez Crespo |                       |                  |             |                                          | Principal Investigator                                  |                                                                                            |  |  |  |  |  |  |
| Howard                            | Schwartz       |                       |                  |             |                                          | Sub-Investigator                                        |                                                                                            |  |  |  |  |  |  |
| Surisaday                         | Mederos        |                       |                  |             |                                          | Sub-Investigator                                        |                                                                                            |  |  |  |  |  |  |
| Janet Sentil                      | Tamayo         |                       |                  |             |                                          | Sub-Investigator                                        |                                                                                            |  |  |  |  |  |  |
| Craig                             | Shapiro        |                       |                  |             |                                          | Sub-Investigator                                        |                                                                                            |  |  |  |  |  |  |
| Orbein                            | Mallet         |                       |                  |             |                                          | Sub-Investigator                                        |                                                                                            |  |  |  |  |  |  |
| Karenda                           | Plotka         |                       |                  |             |                                          | Pharmacist                                              |                                                                                            |  |  |  |  |  |  |
| Carlos                            | Valladares     |                       |                  |             |                                          | Pharmacist                                              |                                                                                            |  |  |  |  |  |  |
| Karenda                           | Palmer         |                       |                  |             |                                          | Pharmacist                                              |                                                                                            |  |  |  |  |  |  |
| Dayana                            | Deltejo        |                       |                  |             |                                          | Study Coordinator                                       |                                                                                            |  |  |  |  |  |  |
| Katherine                         | Garcia         |                       |                  |             |                                          | Study Coordinator                                       |                                                                                            |  |  |  |  |  |  |
| Marilein                          | Camacho        |                       |                  |             |                                          | Study Coordinator                                       |                                                                                            |  |  |  |  |  |  |
| Yarixa                            | Chanza         |                       |                  |             |                                          | Study Coordinator                                       |                                                                                            |  |  |  |  |  |  |
| Jocelyn                           | Morera         |                       |                  |             |                                          | Study Coordinator                                       |                                                                                            |  |  |  |  |  |  |
| Claudette                         | Davis          |                       |                  |             |                                          | Study Coordinator                                       |                                                                                            |  |  |  |  |  |  |
| Karlene                           | Dawson         |                       |                  |             |                                          | Data Entry                                              |                                                                                            |  |  |  |  |  |  |
| Vivian                            | Rosales        |                       |                  |             |                                          | Data Entry                                              |                                                                                            |  |  |  |  |  |  |
| Dunia                             | Torres         |                       |                  |             |                                          | Laboratory Contact                                      |                                                                                            |  |  |  |  |  |  |
| Maria                             | Pinero         |                       |                  |             |                                          | Laboratory Contact                                      |                                                                                            |  |  |  |  |  |  |
| Catherine                         | Cruz           |                       |                  |             |                                          | Data Entry                                              |                                                                                            |  |  |  |  |  |  |
| Beatriz                           | Rivera         |                       |                  |             |                                          | Recruitment Coordinator                                 |                                                                                            |  |  |  |  |  |  |
| Patricia                          | Balebona       |                       |                  |             |                                          | Data Entry                                              |                                                                                            |  |  |  |  |  |  |
| Andrea                            | Basurco        |                       |                  |             |                                          | Ethics/Regulatory Contact                               |                                                                                            |  |  |  |  |  |  |
| Jenny                             | Montoya        |                       |                  |             |                                          | Ethics/Regulatory Contact                               |                                                                                            |  |  |  |  |  |  |
| Mikael                            | Yaniz          |                       |                  |             |                                          | Laboratory Contact                                      |                                                                                            |  |  |  |  |  |  |
| Pedro                             | Petit Phar     |                       |                  |             |                                          | Data Entry                                              |                                                                                            |  |  |  |  |  |  |
| Christy                           | Filgueiras     |                       |                  |             |                                          | Data Entry                                              |                                                                                            |  |  |  |  |  |  |
| May                               | Fernandez      |                       |                  |             |                                          | ISF Shipping Contact                                    |                                                                                            |  |  |  |  |  |  |
| Latauri                           | Skrine         |                       |                  |             |                                          | Laboratory Contact                                      |                                                                                            |  |  |  |  |  |  |
| Aaliarys                          | Alcantara      |                       |                  |             |                                          | Recruitment Coordinator                                 |                                                                                            |  |  |  |  |  |  |
| Isnier                            | Parodis        |                       |                  |             |                                          | Laboratory Contact                                      |                                                                                            |  |  |  |  |  |  |

Supplemental Online Content: Nonauthor Collaborators

\*Indicates required information. Only first name, last name, and suffix will appear in PubMed.

| *First Name and Middle Initial(s) | *Last Name      | *Suffix (eg, Jr, III) | Academic Degrees | Institution | Location (city, state/province, country) | Role or Contribution, eg, chair, principal investigator | Group (if more than 1 Group listed in the byline) and/or Subgroup (eg, Steering Committee) |  |  |  |  |  |  |
|-----------------------------------|-----------------|-----------------------|------------------|-------------|------------------------------------------|---------------------------------------------------------|--------------------------------------------------------------------------------------------|--|--|--|--|--|--|
| Jessica                           | Parodis         |                       |                  |             |                                          | Recruitment Coordinator                                 |                                                                                            |  |  |  |  |  |  |
| Jailene                           | Jara            |                       |                  |             |                                          | Recruitment Coordinator                                 |                                                                                            |  |  |  |  |  |  |
| Joslandey                         | Alouption       |                       |                  |             |                                          | Data Entry                                              |                                                                                            |  |  |  |  |  |  |
| Malvin                            | Yan             |                       |                  |             |                                          | Principal Investigator                                  |                                                                                            |  |  |  |  |  |  |
| Jesse                             | Padilla         |                       |                  |             |                                          | Study Coordinator                                       |                                                                                            |  |  |  |  |  |  |
| Carolina                          | Cruz            |                       |                  |             |                                          | Study Coordinator                                       |                                                                                            |  |  |  |  |  |  |
| Bianca                            | Bran            |                       |                  |             |                                          | Study Coordinator                                       |                                                                                            |  |  |  |  |  |  |
| Vanessa                           | Flores          |                       |                  |             |                                          | Pharmacist                                              |                                                                                            |  |  |  |  |  |  |
| Leandro                           | Perez           |                       |                  |             |                                          | Principal Investigator                                  |                                                                                            |  |  |  |  |  |  |
| Arthur                            | Labovitz        |                       |                  |             |                                          | Old Principal Investigator                              |                                                                                            |  |  |  |  |  |  |
| Tracey                            | Roth            |                       |                  |             |                                          | Sub-Investigator                                        |                                                                                            |  |  |  |  |  |  |
| Julian                            | Javier          |                       |                  |             |                                          | Sub-Investigator                                        |                                                                                            |  |  |  |  |  |  |
| Lorenzo                           | Jimenez         |                       |                  |             |                                          | Pharmacist                                              |                                                                                            |  |  |  |  |  |  |
| Carmen                            | Ojeda           |                       |                  |             |                                          | Study Coordinator                                       |                                                                                            |  |  |  |  |  |  |
| Maria                             | Caceres         |                       |                  |             |                                          | Study Coordinator                                       |                                                                                            |  |  |  |  |  |  |
| Lorenzo                           | Jimenez         |                       |                  |             |                                          | Study Coordinator                                       |                                                                                            |  |  |  |  |  |  |
| Caren                             | Misir           |                       |                  |             |                                          | Study Coordinator                                       |                                                                                            |  |  |  |  |  |  |
| Kyle                              | Rudd            |                       |                  |             |                                          | Study Coordinator                                       |                                                                                            |  |  |  |  |  |  |
| Juan                              | Ramos           |                       |                  |             |                                          | Budget/Contracts Contact                                |                                                                                            |  |  |  |  |  |  |
| Wasim                             | Deeb            |                       |                  |             |                                          | Principal Investigator                                  |                                                                                            |  |  |  |  |  |  |
| Mohannad                          | Bisharat        |                       |                  |             |                                          | Sub-Investigator                                        |                                                                                            |  |  |  |  |  |  |
| Amy                               | Dennis-Saltz    |                       |                  |             |                                          | Sub-Investigator                                        |                                                                                            |  |  |  |  |  |  |
| David                             | Sutton          |                       |                  |             |                                          | Sub-Investigator                                        |                                                                                            |  |  |  |  |  |  |
| James                             | Magee           |                       |                  |             |                                          | Sub-Investigator                                        |                                                                                            |  |  |  |  |  |  |
| Majdi                             | Ashchi          |                       |                  |             |                                          | Sub-Investigator                                        |                                                                                            |  |  |  |  |  |  |
| Rebecca                           | Goldfaden       |                       |                  |             |                                          | Sub-Investigator                                        |                                                                                            |  |  |  |  |  |  |
| Mae                               | Sheikh-Ali      |                       |                  |             |                                          | Sub-Investigator                                        |                                                                                            |  |  |  |  |  |  |
| Stacey                            | Kelly           |                       |                  |             |                                          | Sub-Investigator                                        |                                                                                            |  |  |  |  |  |  |
| Elias                             | Nicolas Saikali |                       |                  |             |                                          | Sub-Investigator                                        |                                                                                            |  |  |  |  |  |  |
| Gloria                            | Rodel Ramirez   |                       |                  |             |                                          | Sub-Investigator                                        |                                                                                            |  |  |  |  |  |  |
| Debbie                            | Domingo         |                       |                  |             |                                          | Study Coordinator                                       |                                                                                            |  |  |  |  |  |  |
| William                           | Hodge           |                       |                  |             |                                          | Study Coordinator                                       |                                                                                            |  |  |  |  |  |  |
| Adrienne                          | Greenewalt      |                       |                  |             |                                          | Study Coordinator                                       |                                                                                            |  |  |  |  |  |  |
| Lauren                            | Stamschror      |                       |                  |             |                                          | Study Coordinator                                       |                                                                                            |  |  |  |  |  |  |
| Kaitlyn                           | Preston         |                       |                  |             |                                          | Study Coordinator                                       |                                                                                            |  |  |  |  |  |  |
| Leann                             | Petschonek      |                       |                  |             |                                          | Study Coordinator                                       |                                                                                            |  |  |  |  |  |  |
| Lauren                            | Stamschror      |                       |                  |             |                                          | Study Coordinator                                       |                                                                                            |  |  |  |  |  |  |

Supplemental Online Content: Nonauthor Collaborators

\*Indicates required information. Only first name, last name, and suffix will appear in PubMed.

| *First Name and Middle Initial(s) | *Last Name   | *Suffix (eg, Jr, III) | Academic Degrees | Institution | Location (city, state/province, country) | Role or Contribution, eg, chair, principal investigator | Group (if more than 1 Group listed in the byline) and/or Subgroup (eg, Steering Committee) |  |  |  |  |  |  |
|-----------------------------------|--------------|-----------------------|------------------|-------------|------------------------------------------|---------------------------------------------------------|--------------------------------------------------------------------------------------------|--|--|--|--|--|--|
| Katie                             | Graf         |                       |                  |             |                                          | Study Coordinator                                       |                                                                                            |  |  |  |  |  |  |
| Lynsey                            | Sutton       |                       |                  |             |                                          | Study Coordinator                                       |                                                                                            |  |  |  |  |  |  |
| Meghan                            | Edson        |                       |                  |             |                                          | Study Coordinator                                       |                                                                                            |  |  |  |  |  |  |
| Madison                           | Charron      |                       |                  |             |                                          | Study Coordinator                                       |                                                                                            |  |  |  |  |  |  |
| Mika                              | Taylor       |                       |                  |             |                                          | Ethics/Regulatory Contact                               |                                                                                            |  |  |  |  |  |  |
| Emily                             | Knisely      |                       |                  |             |                                          | Ethics/Regulatory Contact                               |                                                                                            |  |  |  |  |  |  |
|                                   |              |                       |                  |             |                                          |                                                         |                                                                                            |  |  |  |  |  |  |
| Ashwini                           | Gore         |                       |                  |             |                                          | Principal Investigator                                  |                                                                                            |  |  |  |  |  |  |
| Thomas                            | Jones        |                       |                  |             |                                          | Sub-Investigator                                        |                                                                                            |  |  |  |  |  |  |
| Barry                             | Johns        |                       |                  |             |                                          | Sub-Investigator                                        |                                                                                            |  |  |  |  |  |  |
| Jennifer                          | Sheldon      |                       |                  |             |                                          | Sub-Investigator                                        |                                                                                            |  |  |  |  |  |  |
| Kayla                             | Merritt      |                       |                  |             |                                          | Sub-Investigator                                        |                                                                                            |  |  |  |  |  |  |
| Lisa                              | Hichkad      |                       |                  |             |                                          | Sub-Investigator                                        |                                                                                            |  |  |  |  |  |  |
| Leah                              | Barbee       |                       |                  |             |                                          | Sub-Investigator                                        |                                                                                            |  |  |  |  |  |  |
| Amanda                            | Riley        |                       |                  |             |                                          | Sub-Investigator                                        |                                                                                            |  |  |  |  |  |  |
| Lindsay                           | Alexander    |                       |                  |             |                                          | Study Coordinator                                       |                                                                                            |  |  |  |  |  |  |
| Kaitlyn                           | Preston      |                       |                  |             |                                          | Study Coordinator                                       |                                                                                            |  |  |  |  |  |  |
| Lilly                             | Dasher       |                       |                  |             |                                          | Study Coordinator                                       |                                                                                            |  |  |  |  |  |  |
| Leann                             | Petschonek   |                       |                  |             |                                          | Study Coordinator                                       |                                                                                            |  |  |  |  |  |  |
| Lauren                            | Stamschror   |                       |                  |             |                                          | Study Coordinator                                       |                                                                                            |  |  |  |  |  |  |
| Lynsey                            | Sutton       |                       |                  |             |                                          | Study Coordinator                                       |                                                                                            |  |  |  |  |  |  |
| Meghan                            | Edson        |                       |                  |             |                                          | Study Coordinator                                       |                                                                                            |  |  |  |  |  |  |
| Madison                           | Charron      |                       |                  |             |                                          | Study Coordinator                                       |                                                                                            |  |  |  |  |  |  |
| Mika                              | Taylor       |                       |                  |             |                                          | Ethics/Regulatory Contact                               |                                                                                            |  |  |  |  |  |  |
| Emily                             | Knisely      |                       |                  |             |                                          | Ethics/Regulatory Contact                               |                                                                                            |  |  |  |  |  |  |
| Elio Argimiro                     | Torres Lopez |                       |                  |             |                                          | Principal Investigator                                  |                                                                                            |  |  |  |  |  |  |
| Rafael                            | Baez Bonilla |                       |                  |             |                                          | Sub-Investigator                                        |                                                                                            |  |  |  |  |  |  |
| Anibal                            | Loza         |                       |                  |             |                                          | Sub-Investigator                                        |                                                                                            |  |  |  |  |  |  |
| Dunia                             | Hernandez    |                       |                  |             |                                          | Sub-Investigator                                        |                                                                                            |  |  |  |  |  |  |
| Yaili                             | Perez        |                       |                  |             |                                          | Study Coordinator                                       |                                                                                            |  |  |  |  |  |  |
| Alejandro                         | Perez        |                       |                  |             |                                          | Study Coordinator                                       |                                                                                            |  |  |  |  |  |  |
| Yalily                            | Perez        |                       |                  |             |                                          | Study Coordinator                                       |                                                                                            |  |  |  |  |  |  |
| Denisse                           | Medina       |                       |                  |             |                                          | Laboratory Contact                                      |                                                                                            |  |  |  |  |  |  |
| Emilio                            | Mantero      |                       |                  |             |                                          | Principal Investigator                                  |                                                                                            |  |  |  |  |  |  |
| Ramses                            | Vega         |                       |                  |             |                                          | Sub-Investigator                                        |                                                                                            |  |  |  |  |  |  |
| Noel                              | Pedraza      |                       |                  |             |                                          | Pharmacist                                              |                                                                                            |  |  |  |  |  |  |
| Damian                            | Sosa         |                       |                  |             |                                          | Pharmacist                                              |                                                                                            |  |  |  |  |  |  |
| Lys                               | Robles       |                       |                  |             |                                          | Study Coordinator                                       |                                                                                            |  |  |  |  |  |  |
| Yennifer                          | Machado      |                       |                  |             |                                          | Study Coordinator                                       |                                                                                            |  |  |  |  |  |  |
| Yoandra                           | Sosa         |                       |                  |             |                                          | Study Coordinator                                       |                                                                                            |  |  |  |  |  |  |

Supplemental Online Content: Nonauthor Collaborators

\*Indicates required information. Only first name, last name, and suffix will appear in PubMed.

| *First Name and Middle Initial(s) | *Last Name         | *Suffix (eg, Jr, III) | Academic Degrees | Institution | Location (city, state/province, country) | Role or Contribution, eg, chair, principal investigator | Group (if more than 1 Group listed in the byline) and/or Subgroup (eg, Steering Committee) |  |  |  |  |  |  |
|-----------------------------------|--------------------|-----------------------|------------------|-------------|------------------------------------------|---------------------------------------------------------|--------------------------------------------------------------------------------------------|--|--|--|--|--|--|
| David                             | Guzman             |                       |                  |             |                                          | Principal Investigator                                  |                                                                                            |  |  |  |  |  |  |
| Maricor                           | Grio               |                       |                  |             |                                          | Old Principal Investigator                              |                                                                                            |  |  |  |  |  |  |
| Juan                              | Frias              |                       |                  |             |                                          | Sub-Investigator                                        |                                                                                            |  |  |  |  |  |  |
| Sharon                            | Kelly              |                       |                  |             |                                          | Sub-Investigator                                        |                                                                                            |  |  |  |  |  |  |
| Mark                              | Leibowitz          |                       |                  |             |                                          | Sub-Investigator                                        |                                                                                            |  |  |  |  |  |  |
| John                              | Nelson             |                       |                  |             |                                          | Sub-Investigator                                        |                                                                                            |  |  |  |  |  |  |
| Cheryll                           | Handy              |                       |                  |             |                                          | Sub-Investigator                                        |                                                                                            |  |  |  |  |  |  |
| Alina                             | Greenberg          |                       |                  |             |                                          | Pharmacist                                              |                                                                                            |  |  |  |  |  |  |
| Norma                             | Vega               |                       |                  |             |                                          | Study Coordinator                                       |                                                                                            |  |  |  |  |  |  |
| Angelica                          | Francisco          |                       |                  |             |                                          | Study Coordinator                                       |                                                                                            |  |  |  |  |  |  |
| Coralia                           | Soto               |                       |                  |             |                                          | Study Coordinator                                       |                                                                                            |  |  |  |  |  |  |
| Sinthia                           | Arcadia            |                       |                  |             |                                          | Study Coordinator                                       |                                                                                            |  |  |  |  |  |  |
| Eulalia                           | Francisco          |                       |                  |             |                                          | Study Coordinator                                       |                                                                                            |  |  |  |  |  |  |
| Nicol                             | Escareno           |                       |                  |             |                                          | Regulatory Specialist                                   |                                                                                            |  |  |  |  |  |  |
| Nelly                             | Ayala              |                       |                  |             |                                          | Lab Technician                                          |                                                                                            |  |  |  |  |  |  |
| Jennifer                          | Muniz              |                       |                  |             |                                          | Lab Technician                                          |                                                                                            |  |  |  |  |  |  |
| Jose                              | Espino             |                       |                  |             |                                          | Lab Technician                                          |                                                                                            |  |  |  |  |  |  |
| Daniel                            | Vargas             |                       |                  |             |                                          | Lab Technician                                          |                                                                                            |  |  |  |  |  |  |
| Rosie                             | Jimenez            |                       |                  |             |                                          | Lab Technician                                          |                                                                                            |  |  |  |  |  |  |
| Stephanie                         | Lopez              |                       |                  |             |                                          | Lab Technician                                          |                                                                                            |  |  |  |  |  |  |
| Iliana                            | Gallaga            |                       |                  |             |                                          | Regulatory Specialist                                   |                                                                                            |  |  |  |  |  |  |
| Genesis                           | Heredia            |                       |                  |             |                                          | Lab Technician                                          |                                                                                            |  |  |  |  |  |  |
| Elizabeth                         | Barranco Santana   |                       |                  |             |                                          | Principal Investigator                                  |                                                                                            |  |  |  |  |  |  |
| Rafael                            | Mendoza-Rodriguez  |                       |                  |             |                                          | Sub-Investigator                                        |                                                                                            |  |  |  |  |  |  |
| Sara                              | Cancel Santana     |                       |                  |             |                                          | Pharmacist                                              |                                                                                            |  |  |  |  |  |  |
| Alejandra                         | Román              |                       |                  |             |                                          | Pharmacist                                              |                                                                                            |  |  |  |  |  |  |
| Irmaris                           | Arroyo Torres      |                       |                  |             |                                          | Study Coordinator                                       |                                                                                            |  |  |  |  |  |  |
| Velma                             | Franceschini       |                       |                  |             |                                          | Study Coordinator                                       |                                                                                            |  |  |  |  |  |  |
| Brenda                            | Garcia             |                       |                  |             |                                          | Study Coordinator                                       |                                                                                            |  |  |  |  |  |  |
| Nancy                             | Jimenez            |                       |                  |             |                                          | Study Coordinator                                       |                                                                                            |  |  |  |  |  |  |
| Michele                           | Irizarry Ortiz     |                       |                  |             |                                          | Study Coordinator                                       |                                                                                            |  |  |  |  |  |  |
| Armando                           | Torres Antommattei |                       |                  |             |                                          | Lab Technician                                          |                                                                                            |  |  |  |  |  |  |
|                                   |                    |                       |                  |             |                                          |                                                         |                                                                                            |  |  |  |  |  |  |
| Angel                             | Comulada-Rivera    |                       |                  |             |                                          | Principal Investigator                                  |                                                                                            |  |  |  |  |  |  |
| Andrea                            | Pintado            |                       |                  |             |                                          | Study Coordinator                                       |                                                                                            |  |  |  |  |  |  |
| Sonia                             | Ortiz              |                       |                  |             |                                          | Unblinded Study Coordinator                             |                                                                                            |  |  |  |  |  |  |
| Adamaris                          | Rodriguez          |                       |                  |             |                                          | Study Coordinator                                       |                                                                                            |  |  |  |  |  |  |
| Rosa                              | Mojica Ramirez     |                       |                  |             |                                          | Unblinded back-up Study Coordinator                     |                                                                                            |  |  |  |  |  |  |
|                                   |                    |                       |                  |             |                                          |                                                         |                                                                                            |  |  |  |  |  |  |

Supplemental Online Content: Nonauthor Collaborators

\*Indicates required information. Only first name, last name, and suffix will appear in PubMed.

| *First Name and Middle Initial(s) | *Last Name      | *Suffix (eg, Jr, III) | Academic Degrees | Institution | Location (city, state/province, country) | Role or Contribution, eg, chair, principal investigator | Group (if more than 1 Group listed in the byline) and/or Subgroup (eg, Steering Committee) |  |  |  |  |  |  |
|-----------------------------------|-----------------|-----------------------|------------------|-------------|------------------------------------------|---------------------------------------------------------|--------------------------------------------------------------------------------------------|--|--|--|--|--|--|
| Anthony                           | Olofintuyi      |                       |                  |             |                                          | Principal Investigator                                  |                                                                                            |  |  |  |  |  |  |
| Ricardo                           | Alvarez         |                       |                  |             |                                          | Sub-investigator                                        |                                                                                            |  |  |  |  |  |  |
| Jay                               | Pitts           |                       |                  |             |                                          | Study Coordinator                                       |                                                                                            |  |  |  |  |  |  |
| Jackelyn                          | Samraj          |                       |                  |             |                                          | Study Coordinator                                       |                                                                                            |  |  |  |  |  |  |
| Alma                              | Vasbinder       |                       |                  |             |                                          | Study Coordinator                                       |                                                                                            |  |  |  |  |  |  |
| Amaya                             | Averett         |                       |                  |             |                                          | Study Coordinator                                       |                                                                                            |  |  |  |  |  |  |
| Thomas                            | Kane            |                       |                  |             |                                          | Study Coordinator                                       |                                                                                            |  |  |  |  |  |  |
|                                   |                 |                       |                  |             |                                          |                                                         |                                                                                            |  |  |  |  |  |  |
| Harlicia                          | Farley          |                       |                  |             |                                          | Principal Investigator                                  |                                                                                            |  |  |  |  |  |  |
| Thomas                            | Kendall         |                       |                  |             |                                          | Sub-Investigator                                        |                                                                                            |  |  |  |  |  |  |
| Richard                           | Kemmerlin       |                       |                  |             |                                          | Sub-Investigator                                        |                                                                                            |  |  |  |  |  |  |
| Jackie                            | Saunders        |                       |                  |             |                                          | Study Coordinator                                       |                                                                                            |  |  |  |  |  |  |
| Yolanda                           | Livingston      |                       |                  |             |                                          | Study Coordinator                                       |                                                                                            |  |  |  |  |  |  |
|                                   |                 |                       |                  |             |                                          |                                                         |                                                                                            |  |  |  |  |  |  |
| Barry                             | McLean          |                       |                  |             |                                          | Principal Investigator                                  |                                                                                            |  |  |  |  |  |  |
| Maureen                           | Mayer           |                       |                  |             |                                          | Study Coordinator                                       |                                                                                            |  |  |  |  |  |  |
| Valerie                           | Goodwin         |                       |                  |             |                                          | Sub-Investigator                                        |                                                                                            |  |  |  |  |  |  |
| Evelyne                           | Ngugi           |                       |                  |             |                                          | Study Coordinator                                       |                                                                                            |  |  |  |  |  |  |
| Prateek                           | Mishra          |                       |                  |             |                                          | Study Coordinator                                       |                                                                                            |  |  |  |  |  |  |
| Hannah                            | Carter          |                       |                  |             |                                          | Study Coordinator                                       |                                                                                            |  |  |  |  |  |  |
| Lorie                             | Szymela         |                       |                  |             |                                          | Study Coordinator                                       |                                                                                            |  |  |  |  |  |  |
|                                   |                 |                       |                  |             |                                          |                                                         |                                                                                            |  |  |  |  |  |  |
| Ali                               | Imran           |                       |                  |             |                                          | Principal Investigator                                  |                                                                                            |  |  |  |  |  |  |
| Saiaf                             | Abdallah        |                       |                  |             |                                          | Pharmacist                                              |                                                                                            |  |  |  |  |  |  |
| Nadia                             | Clarke          |                       |                  |             |                                          | Laboratory Contact                                      |                                                                                            |  |  |  |  |  |  |
| Sylvania                          | Hernandez Latog |                       |                  |             |                                          | Sub-Investigator                                        |                                                                                            |  |  |  |  |  |  |
| Broderick                         | Moore           |                       |                  |             |                                          | Pharmacist                                              |                                                                                            |  |  |  |  |  |  |
| Miguel                            | Lopez           |                       |                  |             |                                          | Senior CRC manager                                      |                                                                                            |  |  |  |  |  |  |
| Maureen                           | Tagsip          |                       |                  |             |                                          | CRC II                                                  |                                                                                            |  |  |  |  |  |  |
| Prakash                           | Nepali          |                       |                  |             |                                          | CRC I                                                   |                                                                                            |  |  |  |  |  |  |
| Nivi                              | Kumaran         |                       |                  |             |                                          | Assistant research coordinator                          |                                                                                            |  |  |  |  |  |  |
| Greta                             | Jacinto         |                       |                  |             |                                          | Regulatory coordinator, Ethics                          |                                                                                            |  |  |  |  |  |  |
| Catherine                         | Magsino         |                       |                  |             |                                          | Assistant regulatory coordinator                        |                                                                                            |  |  |  |  |  |  |
| Freddie                           | Batalla         |                       |                  |             |                                          | Senior regulatory manager, Ethics                       |                                                                                            |  |  |  |  |  |  |
| Feroza                            | Imran           |                       |                  |             |                                          | Assistant regulatory coordinator                        |                                                                                            |  |  |  |  |  |  |
|                                   |                 |                       |                  |             |                                          |                                                         |                                                                                            |  |  |  |  |  |  |
| Richard                           | Montgomery      |                       |                  |             |                                          | Principal Investigator                                  |                                                                                            |  |  |  |  |  |  |
| Stephanie                         | Riggs           |                       |                  |             |                                          | Pharmacist                                              |                                                                                            |  |  |  |  |  |  |
| Shavonna                          | Haamid          |                       |                  |             |                                          | Study Coordinator                                       |                                                                                            |  |  |  |  |  |  |
| Catherine                         | Whitt           |                       |                  |             |                                          | Ethics/Regulatory Contact                               |                                                                                            |  |  |  |  |  |  |

Supplemental Online Content: Nonauthor Collaborators

\*Indicates required information. Only first name, last name, and suffix will appear in PubMed.

| *First Name and Middle Initial(s) | *Last Name       | *Suffix (eg, Jr, III) | Academic Degrees | Institution | Location (city, state/province, country) | Role or Contribution, eg, chair, principal investigator | Group (if more than 1 Group listed in the byline) and/or Subgroup (eg, Steering Committee) |  |  |  |  |  |  |
|-----------------------------------|------------------|-----------------------|------------------|-------------|------------------------------------------|---------------------------------------------------------|--------------------------------------------------------------------------------------------|--|--|--|--|--|--|
| William                           | Hopper           |                       |                  |             |                                          | Sub-Investigator                                        |                                                                                            |  |  |  |  |  |  |
| Dominique                         | Smith            |                       |                  |             |                                          | Study Coordinator, Primary                              |                                                                                            |  |  |  |  |  |  |
| Julia                             | Kordsmeier       |                       |                  |             |                                          | Sub-Investigator                                        |                                                                                            |  |  |  |  |  |  |
| Courtney                          | Sherron          |                       |                  |             |                                          | Study Nurse                                             |                                                                                            |  |  |  |  |  |  |
| Miyah                             | Plummer          |                       |                  |             |                                          | Ethics/Regulatory Contact                               |                                                                                            |  |  |  |  |  |  |
| Sherisse                          | Jimenez          |                       |                  |             |                                          | Pharmacist                                              |                                                                                            |  |  |  |  |  |  |
| Airelle                           | Newkirk          |                       |                  |             |                                          | Lab Technician                                          |                                                                                            |  |  |  |  |  |  |
| Laura                             | Murray           |                       |                  |             |                                          | Sub-Investigator                                        |                                                                                            |  |  |  |  |  |  |
| Haley                             | Scott            |                       |                  |             |                                          | Lab Technician                                          |                                                                                            |  |  |  |  |  |  |
| Rebecca                           | Whitney          |                       |                  |             |                                          | Ethics/Regulatory Contact                               |                                                                                            |  |  |  |  |  |  |
| Monica                            | Castro           |                       |                  |             |                                          | Recruitment and Retention                               |                                                                                            |  |  |  |  |  |  |
| Michelle                          | Rhames           |                       |                  |             |                                          | Study Coordinator                                       |                                                                                            |  |  |  |  |  |  |
|                                   |                  |                       |                  |             |                                          |                                                         |                                                                                            |  |  |  |  |  |  |
| Gregorio                          | Cortes-Maisonet  |                       |                  |             |                                          | Principal Investigator                                  |                                                                                            |  |  |  |  |  |  |
| Luis                              | Miranda Martinez |                       |                  |             |                                          | Clinical Operations Director                            |                                                                                            |  |  |  |  |  |  |
| Myriam                            | Allende-Vigo     |                       |                  |             |                                          | Sub-Investigator                                        |                                                                                            |  |  |  |  |  |  |
| Karina                            | Vila             |                       |                  |             |                                          | Sub-Investigator                                        |                                                                                            |  |  |  |  |  |  |
| Michelle                          | Santiago Rivera  |                       |                  |             |                                          | Sub-Investigator                                        |                                                                                            |  |  |  |  |  |  |
| Valerie                           | Yunker           |                       |                  |             |                                          | Unblinded Study Coordinator                             |                                                                                            |  |  |  |  |  |  |
| Bryan                             | Rivera           |                       |                  |             |                                          | Unblinded Study Coordinator                             |                                                                                            |  |  |  |  |  |  |
| Alex                              | Rodriguez        |                       |                  |             |                                          | Research Assistant                                      |                                                                                            |  |  |  |  |  |  |
| Carla                             | Rivera           |                       |                  |             |                                          | Study Nurse                                             |                                                                                            |  |  |  |  |  |  |
| Genesis                           | Reyes Blanco     |                       |                  |             |                                          | Study Coordinator                                       |                                                                                            |  |  |  |  |  |  |
| Keven                             | Batista Colon    |                       |                  |             |                                          | Unblinded Study Coordinator                             |                                                                                            |  |  |  |  |  |  |
| Mariely                           | Cruz             |                       |                  |             |                                          | Study Coordinator, Primary                              |                                                                                            |  |  |  |  |  |  |
|                                   |                  |                       |                  |             |                                          |                                                         |                                                                                            |  |  |  |  |  |  |
| Chinedu                           | Nweke            |                       |                  |             |                                          | Principal Investigator                                  |                                                                                            |  |  |  |  |  |  |
| Norah                             | Okafor           |                       |                  |             |                                          | Study Coordinator                                       |                                                                                            |  |  |  |  |  |  |
| Angela                            | Nweke            |                       |                  |             |                                          | Study Coordinator, Primary                              |                                                                                            |  |  |  |  |  |  |
| Daisy                             | Chaves-Montoya   |                       |                  |             |                                          | Laboratory Contact                                      |                                                                                            |  |  |  |  |  |  |
| Heather                           | Patrick          |                       |                  |             |                                          | Pharmacist                                              |                                                                                            |  |  |  |  |  |  |
| Stephanie                         | Alvarez          |                       |                  |             |                                          | Laboratory Contact                                      |                                                                                            |  |  |  |  |  |  |
| Eunice                            | Momeh            |                       |                  |             |                                          | Laboratory Contact                                      |                                                                                            |  |  |  |  |  |  |
| Cyriacus                          | Anaele           |                       |                  |             |                                          | Sub-Investigator                                        |                                                                                            |  |  |  |  |  |  |
| Katherine                         | McArthur         |                       |                  |             |                                          | Laboratory Contact                                      |                                                                                            |  |  |  |  |  |  |
| Peter                             | Longonje         |                       |                  |             |                                          | Pharmacist                                              |                                                                                            |  |  |  |  |  |  |
| Danielle                          | Husbands         |                       |                  |             |                                          | Study Coordinator                                       |                                                                                            |  |  |  |  |  |  |
| Iasia                             | Williams         |                       |                  |             |                                          | Study Coordinator                                       |                                                                                            |  |  |  |  |  |  |
| Christine                         | Dillingham       |                       |                  |             |                                          | Sub-Investigator                                        |                                                                                            |  |  |  |  |  |  |
| Gloria                            | Sanchez Sayyah   |                       |                  |             |                                          | Study Coordinator                                       |                                                                                            |  |  |  |  |  |  |

Supplemental Online Content: Nonauthor Collaborators

\*Indicates required information. Only first name, last name, and suffix will appear in PubMed.

| *First Name and Middle Initial(s) | *Last Name   | *Suffix (eg, Jr, III) | Academic Degrees | Institution | Location (city, state/province, country) | Role or Contribution, eg, chair, principal investigator | Group (if more than 1 Group listed in the byline) and/or Subgroup (eg, Steering Committee) |  |  |  |  |  |  |  |
|-----------------------------------|--------------|-----------------------|------------------|-------------|------------------------------------------|---------------------------------------------------------|--------------------------------------------------------------------------------------------|--|--|--|--|--|--|--|
| Laura                             | Carey        |                       |                  |             |                                          | Pharmacist                                              |                                                                                            |  |  |  |  |  |  |  |
| Clarissa                          | Brock        |                       |                  |             |                                          | Pharmacist                                              |                                                                                            |  |  |  |  |  |  |  |
| Rubaba                            | Hussain      |                       |                  |             |                                          | Principal Investigator                                  |                                                                                            |  |  |  |  |  |  |  |
| Khadiza                           | Sultana      |                       |                  |             |                                          | Study Coordinator, Primary                              |                                                                                            |  |  |  |  |  |  |  |
| Omar                              | Mohammad     |                       |                  |             |                                          | Pharmacist                                              |                                                                                            |  |  |  |  |  |  |  |
| Jennifer                          | Lopez        |                       |                  |             |                                          | Study Coordinator                                       |                                                                                            |  |  |  |  |  |  |  |
| Valeria                           | Bittencourt  |                       |                  |             |                                          | Study Coordinator                                       |                                                                                            |  |  |  |  |  |  |  |
| Sneha                             | Prasad       |                       |                  |             |                                          | Study Coordinator                                       |                                                                                            |  |  |  |  |  |  |  |
| Nafsun                            | Akther       |                       |                  |             |                                          | Study Coordinator                                       |                                                                                            |  |  |  |  |  |  |  |
| Timothy                           | Smith        |                       |                  |             |                                          | Principal Investigator                                  |                                                                                            |  |  |  |  |  |  |  |
| Sheri                             | Rocco        |                       |                  |             |                                          | LPN                                                     |                                                                                            |  |  |  |  |  |  |  |
| Donna                             | Straatmann   |                       |                  |             |                                          | Study Coordinator, Primary                              |                                                                                            |  |  |  |  |  |  |  |
| Jill                              | Stoneman     |                       |                  |             |                                          | Family nurse practitioner                               |                                                                                            |  |  |  |  |  |  |  |
| Elizabeth                         | Maryas       |                       |                  |             |                                          | Study Coordinator                                       |                                                                                            |  |  |  |  |  |  |  |
| Johanna                           | Gravier      |                       |                  |             |                                          | Study Coordinator                                       |                                                                                            |  |  |  |  |  |  |  |
| Walter                            | Faggett      |                       |                  |             |                                          | Principal Investigator                                  |                                                                                            |  |  |  |  |  |  |  |
| Andres                            | Jimenez      |                       |                  |             |                                          | Study Coordinator                                       |                                                                                            |  |  |  |  |  |  |  |
| Maria                             | Maya Alvarez |                       |                  |             |                                          | Ethics/Regulatory Contact                               |                                                                                            |  |  |  |  |  |  |  |
| Wendy                             | Evora        |                       |                  |             |                                          | Study Coordinator                                       |                                                                                            |  |  |  |  |  |  |  |
| Alcira                            | Herrera      |                       |                  |             |                                          | Pharmacist                                              |                                                                                            |  |  |  |  |  |  |  |
| Lorena                            | Leonardi     |                       |                  |             |                                          | Study Coordinator                                       |                                                                                            |  |  |  |  |  |  |  |
| Adam                              | Karns        |                       |                  |             |                                          | Principal Investigator                                  |                                                                                            |  |  |  |  |  |  |  |
| Edith                             | Sisneros     |                       |                  |             |                                          | Study Coordinator                                       |                                                                                            |  |  |  |  |  |  |  |
| Sarom                             | Hong         |                       |                  |             |                                          | Study Coordinator                                       |                                                                                            |  |  |  |  |  |  |  |
| Iurii                             | Rudyk        |                       |                  |             |                                          | Principal Investigator                                  |                                                                                            |  |  |  |  |  |  |  |
| Olena                             | Medentseva   |                       |                  |             |                                          | Sub-Investigator                                        |                                                                                            |  |  |  |  |  |  |  |
| Maryna                            | Alexeeva     |                       |                  |             |                                          | Pharmacist                                              |                                                                                            |  |  |  |  |  |  |  |
| Nataliya                          | Strakhova    |                       |                  |             |                                          | Study Nurse                                             |                                                                                            |  |  |  |  |  |  |  |
| Tetyana                           | Lozyk        |                       |                  |             |                                          | Pharmacist                                              |                                                                                            |  |  |  |  |  |  |  |
| Denys                             | Babichev     |                       |                  |             |                                          | Sub-Investigator                                        |                                                                                            |  |  |  |  |  |  |  |
| Kostiantyn                        | Yushko       |                       |                  |             |                                          | Sub-Investigator                                        |                                                                                            |  |  |  |  |  |  |  |
| Vira                              | Tseluyko     |                       |                  |             |                                          | Principal Investigator                                  |                                                                                            |  |  |  |  |  |  |  |
| Andriy                            | Zhadan       |                       |                  |             |                                          | Sub-Investigator                                        |                                                                                            |  |  |  |  |  |  |  |
| Olena                             | Butko        |                       |                  |             |                                          | Pharmacist                                              |                                                                                            |  |  |  |  |  |  |  |
| Oksana                            | Mishchenko   |                       |                  |             |                                          | Pharmacist                                              |                                                                                            |  |  |  |  |  |  |  |
| Olha                              | Radchenko    |                       |                  |             |                                          | Study Coordinator                                       |                                                                                            |  |  |  |  |  |  |  |



Supplemental Online Content: Nonauthor Collaborators

\*Indicates required information. Only first name, last name, and suffix will appear in PubMed.

| *First Name and Middle Initial(s) | *Last Name    | *Suffix (eg, Jr, III) | Academic Degrees | Institution | Location (city, state/province, country) | Role or Contribution, eg, chair, principal investigator | Group (if more than 1 Group listed in the byline) and/or Subgroup (eg, Steering Committee) |  |  |  |  |  |  |
|-----------------------------------|---------------|-----------------------|------------------|-------------|------------------------------------------|---------------------------------------------------------|--------------------------------------------------------------------------------------------|--|--|--|--|--|--|
| Oleksandr                         | Karpenko      |                       |                  |             |                                          | Principal Investigator                                  |                                                                                            |  |  |  |  |  |  |
| Polina                            | Klimko        |                       |                  |             |                                          | Pharmacist                                              |                                                                                            |  |  |  |  |  |  |
| Anna                              | Berezhniak    |                       |                  |             |                                          | Pharmacist                                              |                                                                                            |  |  |  |  |  |  |
| Liudmyla                          | Todoriuk      |                       |                  |             |                                          | Sub-Investigator                                        |                                                                                            |  |  |  |  |  |  |
| Svitlana                          | Bezuglova     |                       |                  |             |                                          | Sub-Investigator                                        |                                                                                            |  |  |  |  |  |  |
| Liubov                            | Mitskevych    |                       |                  |             |                                          | Sub-Investigator                                        |                                                                                            |  |  |  |  |  |  |
| Svitlana                          | Kizim         |                       |                  |             |                                          | Sub-Investigator                                        |                                                                                            |  |  |  |  |  |  |
| Inna                              | Nevolina      |                       |                  |             |                                          | Study Coordinator                                       |                                                                                            |  |  |  |  |  |  |
| Oksana                            | Galchenko     |                       |                  |             |                                          | Study Nurse                                             |                                                                                            |  |  |  |  |  |  |
| Oleksii                           | Korzh         |                       |                  |             |                                          | Principal Investigator                                  |                                                                                            |  |  |  |  |  |  |
| Olena                             | Pankova       |                       |                  |             |                                          | Sub-Investigator                                        |                                                                                            |  |  |  |  |  |  |
| Yana                              | Fylenko       |                       |                  |             |                                          | Sub-Investigator                                        |                                                                                            |  |  |  |  |  |  |
| Valeriia                          | Ziabchenko    |                       |                  |             |                                          | Pharmacist                                              |                                                                                            |  |  |  |  |  |  |
| Sergiy                            | Krasnokutskiy |                       |                  |             |                                          | Pharmacist                                              |                                                                                            |  |  |  |  |  |  |
| Artem                             | Liashok       |                       |                  |             |                                          | Sub-Investigator                                        |                                                                                            |  |  |  |  |  |  |
|                                   |               |                       |                  |             |                                          |                                                         |                                                                                            |  |  |  |  |  |  |
| Oleksandra                        | Donets        |                       |                  |             |                                          | Principal Investigator                                  |                                                                                            |  |  |  |  |  |  |
| Anna                              | Mishustina    |                       |                  |             |                                          | Pharmacist                                              |                                                                                            |  |  |  |  |  |  |
| Liliya                            | Khrustalyova  |                       |                  |             |                                          | Pharmacist                                              |                                                                                            |  |  |  |  |  |  |
| Dmytro                            | Donets        |                       |                  |             |                                          | Sub-Investigator                                        |                                                                                            |  |  |  |  |  |  |
| Yuliia                            | Rybachok      |                       |                  |             |                                          | Sub-Investigator                                        |                                                                                            |  |  |  |  |  |  |
| Vyacheslav                        | Senchylo      |                       |                  |             |                                          | Study Nurse                                             |                                                                                            |  |  |  |  |  |  |
| Iryna                             | Lyakhova      |                       |                  |             |                                          | Study Coordinator                                       |                                                                                            |  |  |  |  |  |  |
| Olena                             | Takhaieva     |                       |                  |             |                                          | Study Nurse                                             |                                                                                            |  |  |  |  |  |  |
| Anna                              | Shkroba       |                       |                  |             |                                          | Sub-Investigator                                        |                                                                                            |  |  |  |  |  |  |
| Diana                             | Shchypak      |                       |                  |             |                                          | Study Coordinator, Primary                              |                                                                                            |  |  |  |  |  |  |
|                                   |               |                       |                  |             |                                          |                                                         |                                                                                            |  |  |  |  |  |  |
| Nadiya                            | Tryshchuk     |                       |                  |             |                                          | Principal Investigator                                  |                                                                                            |  |  |  |  |  |  |
| Olga                              | Pieshkova     |                       |                  |             |                                          | Sub-Investigator                                        |                                                                                            |  |  |  |  |  |  |
| Olena                             | Karaia        |                       |                  |             |                                          | Sub-Investigator                                        |                                                                                            |  |  |  |  |  |  |
| Anna                              | Yakovleva     |                       |                  |             |                                          | Pharmacist                                              |                                                                                            |  |  |  |  |  |  |
|                                   |               |                       |                  |             |                                          |                                                         |                                                                                            |  |  |  |  |  |  |
| Olha                              | Horoshko      |                       |                  |             |                                          | Principal Investigator                                  |                                                                                            |  |  |  |  |  |  |
| Tetiana                           | Lohdanidi     |                       |                  |             |                                          | Pharmacist                                              |                                                                                            |  |  |  |  |  |  |
| Nestor                            | Belei         |                       |                  |             |                                          | Sub-Investigator                                        |                                                                                            |  |  |  |  |  |  |
| Inga                              | Kuzmenko      |                       |                  |             |                                          | Sub-Investigator                                        |                                                                                            |  |  |  |  |  |  |
| Tetiana                           | Demchuk       |                       |                  |             |                                          | Pharmacist                                              |                                                                                            |  |  |  |  |  |  |
|                                   |               |                       |                  |             |                                          |                                                         |                                                                                            |  |  |  |  |  |  |
| Sergii                            | Cherniuk      |                       |                  |             |                                          | Principal Investigator                                  |                                                                                            |  |  |  |  |  |  |
| Alina                             | Kozliuk       |                       |                  |             |                                          | Sub-Investigator                                        |                                                                                            |  |  |  |  |  |  |

## Supplemental Online Content: Nonauthor Collaborators

\*Indicates required information. Only first name, last name, and suffix will appear in PubMed.

| *First Name and Middle Initial(s) | *Last Name        | *Suffix (eg, Jr, III) | Academic Degrees | Institution | Location (city, state/province, country) | Role or Contribution, eg, chair, principal investigator | Group (if more than 1 Group listed in the byline) and/or Subgroup (eg, Steering Committee) |  |  |  |  |  |  |
|-----------------------------------|-------------------|-----------------------|------------------|-------------|------------------------------------------|---------------------------------------------------------|--------------------------------------------------------------------------------------------|--|--|--|--|--|--|
| Volodymyr                         | Kovalenko         |                       |                  |             |                                          | Sub-Investigator/Pharmacist                             |                                                                                            |  |  |  |  |  |  |
| Valerii                           | Adarichev         |                       |                  |             |                                          | Pharmacist                                              |                                                                                            |  |  |  |  |  |  |
| Igor                              | Vakaliuk          |                       |                  |             |                                          | Principal Investigator                                  |                                                                                            |  |  |  |  |  |  |
| Nataliia                          | Tymochko          |                       |                  |             |                                          | Sub-Investigator                                        |                                                                                            |  |  |  |  |  |  |
| Volodymyra                        | Sovtus            |                       |                  |             |                                          | Sub-Investigator                                        |                                                                                            |  |  |  |  |  |  |
| Nadiia                            | Haliuk            |                       |                  |             |                                          | Pharmacist                                              |                                                                                            |  |  |  |  |  |  |
| Daniel                            | Gaudet            |                       |                  |             |                                          | Principal Investigator                                  |                                                                                            |  |  |  |  |  |  |
| Fanny                             | Côté              |                       |                  |             |                                          | Sub-Investigator                                        |                                                                                            |  |  |  |  |  |  |
| Jean-Philippe                     | Milot             |                       |                  |             |                                          | Sub-Investigator                                        |                                                                                            |  |  |  |  |  |  |
| Nathalie                          | Roy               |                       |                  |             |                                          | Sub-Investigator                                        |                                                                                            |  |  |  |  |  |  |
| Andrea                            | Larouche          |                       |                  |             |                                          | Pharmacist                                              |                                                                                            |  |  |  |  |  |  |
| Johanne                           | Piché             |                       |                  |             |                                          | Pharmacist                                              |                                                                                            |  |  |  |  |  |  |
| Laurie-Anne                       | Charest           |                       |                  |             |                                          | Pharmacist                                              |                                                                                            |  |  |  |  |  |  |
| Josiane                           | Dufour            |                       |                  |             |                                          | Study Coordinator, Primary                              |                                                                                            |  |  |  |  |  |  |
| Joannie                           | Pageau            |                       |                  |             |                                          | Study Coordinator                                       |                                                                                            |  |  |  |  |  |  |
| Noemie                            | Audet-Verreault   |                       |                  |             |                                          | Study Coordinator                                       |                                                                                            |  |  |  |  |  |  |
| Lyne                              | Côté              |                       |                  |             |                                          | Study Nurse                                             |                                                                                            |  |  |  |  |  |  |
| Melissa                           | Gagnon            |                       |                  |             |                                          | Study Nurse                                             |                                                                                            |  |  |  |  |  |  |
| Véronique                         | Côté              |                       |                  |             |                                          | Study Nurse                                             |                                                                                            |  |  |  |  |  |  |
| Denise                            | Morin             |                       |                  |             |                                          | Lab Technician                                          |                                                                                            |  |  |  |  |  |  |
| Jessica                           | Fortin-Mimeault   |                       |                  |             |                                          | Lab Technician                                          |                                                                                            |  |  |  |  |  |  |
| Marc-Olivier                      | Brassard          |                       |                  |             |                                          | Lab Technician                                          |                                                                                            |  |  |  |  |  |  |
| Helene                            | Gagne             |                       |                  |             |                                          | Administrator                                           |                                                                                            |  |  |  |  |  |  |
| Sophie                            | Rousseau          |                       |                  |             |                                          | Safety Distribution Contact/ Ethics/Regulatory Contact  |                                                                                            |  |  |  |  |  |  |
| Ying Tung                         | Sia               |                       |                  |             |                                          | Principal Investigator                                  |                                                                                            |  |  |  |  |  |  |
| Ezequiel                          | Guzzetti          |                       |                  |             |                                          | Sub-Investigator                                        |                                                                                            |  |  |  |  |  |  |
| Ramon                             | Alejandro Gisbert |                       |                  |             |                                          | Sub-Investigator                                        |                                                                                            |  |  |  |  |  |  |
| Mariana                           | Dias              |                       |                  |             |                                          | Pharmacist                                              |                                                                                            |  |  |  |  |  |  |
| Mariana                           | de Oliveira       |                       |                  |             |                                          | Study Coordinator, Primary                              |                                                                                            |  |  |  |  |  |  |
| Claudia                           | Cote              |                       |                  |             |                                          | Study Coordinator                                       |                                                                                            |  |  |  |  |  |  |
| Izabel                            | Rodrigues         |                       |                  |             |                                          | Study Coordinator                                       |                                                                                            |  |  |  |  |  |  |
| Johanne                           | Blanchard         |                       |                  |             |                                          | Study Coordinator                                       |                                                                                            |  |  |  |  |  |  |
| Laurence                          | Labbe             |                       |                  |             |                                          | Study Coordinator                                       |                                                                                            |  |  |  |  |  |  |
| Sabrina                           | Dumoulin Lemay    |                       |                  |             |                                          | Study Coordinator                                       |                                                                                            |  |  |  |  |  |  |
| Kathleen                          | Beauchemin        |                       |                  |             |                                          | Research Nurse                                          |                                                                                            |  |  |  |  |  |  |
| Roxanne                           | Turcotte          |                       |                  |             |                                          | Research Nurse                                          |                                                                                            |  |  |  |  |  |  |
| Annabelle                         | Beaudoin          |                       |                  |             |                                          | Study Nurse                                             |                                                                                            |  |  |  |  |  |  |
| Chansamone                        | Saliphod          |                       |                  |             |                                          | Study Nurse                                             |                                                                                            |  |  |  |  |  |  |

Supplemental Online Content: Nonauthor Collaborators

\*Indicates required information. Only first name, last name, and suffix will appear in PubMed.

| *First Name and Middle Initial(s) | *Last Name     | *Suffix (eg, Jr, III) | Academic Degrees | Institution | Location (city, state/province, country) | Role or Contribution, eg, chair, principal investigator | Group (if more than 1 Group listed in the byline) and/or Subgroup (eg, Steering Committee) |  |  |  |  |  |  |
|-----------------------------------|----------------|-----------------------|------------------|-------------|------------------------------------------|---------------------------------------------------------|--------------------------------------------------------------------------------------------|--|--|--|--|--|--|
| Chantal                           | Lamontagne     |                       |                  |             |                                          | Laboratory Contact                                      |                                                                                            |  |  |  |  |  |  |
| Josiane                           | Trudel         |                       |                  |             |                                          | Laboratory Contact                                      |                                                                                            |  |  |  |  |  |  |
| Carolyne                          | Beaudoin       |                       |                  |             |                                          | Data Management                                         |                                                                                            |  |  |  |  |  |  |
| Josée                             | Blanchard      |                       |                  |             |                                          | Data Management                                         |                                                                                            |  |  |  |  |  |  |
| Annie                             | Larouche       |                       |                  |             |                                          | EDC User                                                |                                                                                            |  |  |  |  |  |  |
| Cecile                            | Robinaud       |                       |                  |             |                                          | EDC User                                                |                                                                                            |  |  |  |  |  |  |
| Valérie                           | Paré           |                       |                  |             |                                          | Recruitment and Retention                               |                                                                                            |  |  |  |  |  |  |
| Alexandre                         | Bergeron       |                       |                  |             |                                          | Ethics/Regulatory Contact                               |                                                                                            |  |  |  |  |  |  |
| Maude                             | Bilodeau       |                       |                  |             |                                          | Ethics/Regulatory Contact                               |                                                                                            |  |  |  |  |  |  |
|                                   |                |                       |                  |             |                                          |                                                         |                                                                                            |  |  |  |  |  |  |
| Ethel                             | Bellavance     |                       |                  |             |                                          | Principal Investigator                                  |                                                                                            |  |  |  |  |  |  |
| Eve                               | Betit          |                       |                  |             |                                          | Sub-Investigator                                        |                                                                                            |  |  |  |  |  |  |
| Karine                            | Fortier        |                       |                  |             |                                          | Sub-Investigator                                        |                                                                                            |  |  |  |  |  |  |
| Chantal                           | Lamontagne     |                       |                  |             |                                          | Study Coordinator (Primary, unblinded)                  |                                                                                            |  |  |  |  |  |  |
| Josee                             | Racine         |                       |                  |             |                                          | Study Coordinator (Back-up)                             |                                                                                            |  |  |  |  |  |  |
| Dinah                             | Perras         |                       |                  |             |                                          | Study Coordinator (Back-up)                             |                                                                                            |  |  |  |  |  |  |
| Elyse                             | Boulanger      |                       |                  |             |                                          | Study Coordinator, Primary                              |                                                                                            |  |  |  |  |  |  |
| Christelle                        | Beauchesne     |                       |                  |             |                                          | Research Nurse (unblinded)                              |                                                                                            |  |  |  |  |  |  |
| Sarah                             | Lehoux         |                       |                  |             |                                          | Research Nurse                                          |                                                                                            |  |  |  |  |  |  |
| Vickie                            | Turgeon        |                       |                  |             |                                          | Research Nurse (unblinded)                              |                                                                                            |  |  |  |  |  |  |
| Rachele                           | Cote           |                       |                  |             |                                          | Lab Technician                                          |                                                                                            |  |  |  |  |  |  |
| Annie                             | Larouche       |                       |                  |             |                                          | Data Management/EDC User                                |                                                                                            |  |  |  |  |  |  |
| Carolyne                          | Beaudoin       |                       |                  |             |                                          | Data Management                                         |                                                                                            |  |  |  |  |  |  |
| Josée                             | Blanchard      |                       |                  |             |                                          | Data Management                                         |                                                                                            |  |  |  |  |  |  |
| Cecile                            | Robinaud       |                       |                  |             |                                          | EDC User                                                |                                                                                            |  |  |  |  |  |  |
| Claudia                           | Cote           |                       |                  |             |                                          | Recruitment and Retention                               |                                                                                            |  |  |  |  |  |  |
| Marie-Eve                         | Tardif         |                       |                  |             |                                          | Recruitment and Retention                               |                                                                                            |  |  |  |  |  |  |
| Sabrina                           | Dumoulin Lemay |                       |                  |             |                                          | Recruitment and Retention                               |                                                                                            |  |  |  |  |  |  |
| Valérie                           | Paré           |                       |                  |             |                                          | Recruitment and Retention                               |                                                                                            |  |  |  |  |  |  |
| Alexandre                         | Bergeron       |                       |                  |             |                                          | Ethics/Regulatory Contact                               |                                                                                            |  |  |  |  |  |  |
| Maude                             | Bilodeau       |                       |                  |             |                                          | Ethics/Regulatory Contact                               |                                                                                            |  |  |  |  |  |  |
|                                   |                |                       |                  |             |                                          |                                                         |                                                                                            |  |  |  |  |  |  |
| Naresh                            | Aggarwal       |                       |                  |             |                                          | Principal Investigator                                  |                                                                                            |  |  |  |  |  |  |
| Puja                              | Aggarwal       |                       |                  |             |                                          | Sub-Investigator                                        |                                                                                            |  |  |  |  |  |  |
| Bharti                            | Patel          |                       |                  |             |                                          | Study Coordinator (Primary, blinded)                    |                                                                                            |  |  |  |  |  |  |
| Gurdeep                           | Dhaliwal       |                       |                  |             |                                          | Study Coordinator (unblinded)                           |                                                                                            |  |  |  |  |  |  |
| Preeti                            | Aggarwal       |                       |                  |             |                                          | Study Coordinator (unblinded)                           |                                                                                            |  |  |  |  |  |  |
|                                   |                |                       |                  |             |                                          |                                                         |                                                                                            |  |  |  |  |  |  |
| Guy                               | Tellier        |                       |                  |             |                                          | Principal Investigator                                  |                                                                                            |  |  |  |  |  |  |
| Gilbert                           | Gagne          |                       |                  |             |                                          | Sub-Investigator                                        |                                                                                            |  |  |  |  |  |  |

Supplemental Online Content: Nonauthor Collaborators

\*Indicates required information. Only first name, last name, and suffix will appear in PubMed.

| *First Name and Middle Initial(s) | *Last Name      | *Suffix (eg, Jr, III) | Academic Degrees | Institution | Location (city, state/province, country) | Role or Contribution, eg, chair, principal investigator | Group (if more than 1 Group listed in the byline) and/or Subgroup (eg, Steering Committee) |  |  |  |  |  |  |
|-----------------------------------|-----------------|-----------------------|------------------|-------------|------------------------------------------|---------------------------------------------------------|--------------------------------------------------------------------------------------------|--|--|--|--|--|--|
| Luc                               | Laperriere      |                       |                  |             |                                          | Sub-Investigator                                        |                                                                                            |  |  |  |  |  |  |
| Jennifer                          | Shalala         |                       |                  |             |                                          | Pharmacist                                              |                                                                                            |  |  |  |  |  |  |
| Janelle                           | Danchuk         |                       |                  |             |                                          | Study Coordinator, Primary                              |                                                                                            |  |  |  |  |  |  |
| Catherine                         | Barrette        |                       |                  |             |                                          | Study Coordinator (Back-up)                             |                                                                                            |  |  |  |  |  |  |
| Lydia                             | Lauzon          |                       |                  |             |                                          | Study Coordinator (Back-up)                             |                                                                                            |  |  |  |  |  |  |
| Natalie                           | Langille        |                       |                  |             |                                          | Study Coordinator (Back-up)                             |                                                                                            |  |  |  |  |  |  |
| Sarah                             | Gagné           |                       |                  |             |                                          | Study Coordinator (Back-up)                             |                                                                                            |  |  |  |  |  |  |
| Joanie                            | Lupien          |                       |                  |             |                                          | Study Coordinator                                       |                                                                                            |  |  |  |  |  |  |
| Raphael                           | Brochu          |                       |                  |             |                                          | Study Coordinator                                       |                                                                                            |  |  |  |  |  |  |
| Sophie                            | Coallier        |                       |                  |             |                                          | Study Coordinator                                       |                                                                                            |  |  |  |  |  |  |
|                                   |                 |                       |                  |             |                                          |                                                         |                                                                                            |  |  |  |  |  |  |
| Catherine                         | Vaillancourt    |                       |                  |             |                                          | Principal Investigator                                  |                                                                                            |  |  |  |  |  |  |
| Pierre                            | Lachance        |                       |                  |             |                                          | Old Principal Investigator                              |                                                                                            |  |  |  |  |  |  |
| Diane                             | Carbonneau      |                       |                  |             |                                          | Sub-Investigator                                        |                                                                                            |  |  |  |  |  |  |
| Helene                            | Thibault        |                       |                  |             |                                          | Sub-Investigator                                        |                                                                                            |  |  |  |  |  |  |
| Luc                               | Bouchard        |                       |                  |             |                                          | Sub-Investigator                                        |                                                                                            |  |  |  |  |  |  |
| Andreanne                         | St-Cyr          |                       |                  |             |                                          | Pharmacist                                              |                                                                                            |  |  |  |  |  |  |
| Johanne                           | Rioux           |                       |                  |             |                                          | Pharmacist                                              |                                                                                            |  |  |  |  |  |  |
| Laureanne                         | Quenneville     |                       |                  |             |                                          | Pharmacist                                              |                                                                                            |  |  |  |  |  |  |
| Constance                         | Gagnon          |                       |                  |             |                                          | Study Coordinator (Principal)                           |                                                                                            |  |  |  |  |  |  |
| Theana                            | Nony            |                       |                  |             |                                          | Study Coordinator (Principal)                           |                                                                                            |  |  |  |  |  |  |
| Pascale                           | Laberge         |                       |                  |             |                                          | Study Coordinator (Back-up)                             |                                                                                            |  |  |  |  |  |  |
| Annabelle                         | Corbin          |                       |                  |             |                                          | Data Management                                         |                                                                                            |  |  |  |  |  |  |
| Isabelle                          | Patry           |                       |                  |             |                                          | Data Management                                         |                                                                                            |  |  |  |  |  |  |
| Sophie                            | Savage          |                       |                  |             |                                          | Data Management                                         |                                                                                            |  |  |  |  |  |  |
|                                   |                 |                       |                  |             |                                          |                                                         |                                                                                            |  |  |  |  |  |  |
| Melanie                           | MacNeil         |                       |                  |             |                                          | Principal Investigator                                  |                                                                                            |  |  |  |  |  |  |
| Andrea                            | Murdock         |                       |                  |             |                                          | Pharmacist                                              |                                                                                            |  |  |  |  |  |  |
| Jill                              | Inglis          |                       |                  |             |                                          | Pharmacist                                              |                                                                                            |  |  |  |  |  |  |
| Katelyn                           | Libbus          |                       |                  |             |                                          | Pharmacist                                              |                                                                                            |  |  |  |  |  |  |
| Kathryn                           | Smith           |                       |                  |             |                                          | Study Coordinator, Primary                              |                                                                                            |  |  |  |  |  |  |
| Deseray                           | Johnson         |                       |                  |             |                                          | Study Coordinator & Pharmacist                          |                                                                                            |  |  |  |  |  |  |
| Linda                             | Walters-Findlay |                       |                  |             |                                          | Study Coordinator                                       |                                                                                            |  |  |  |  |  |  |
| Laura                             | Harris          |                       |                  |             |                                          | Study Administrator                                     |                                                                                            |  |  |  |  |  |  |
| Taylor                            | Hutchison       |                       |                  |             |                                          | Lab Technician                                          |                                                                                            |  |  |  |  |  |  |
| Autumn                            | Rafuse          |                       |                  |             |                                          | Central Lab Reports                                     |                                                                                            |  |  |  |  |  |  |
| Julie                             | Thorsen         |                       |                  |             |                                          | Ethics/Regulatory Contact                               |                                                                                            |  |  |  |  |  |  |
| Greg                              | MacDonald       |                       |                  |             |                                          | Payment Contact                                         |                                                                                            |  |  |  |  |  |  |
|                                   |                 |                       |                  |             |                                          |                                                         |                                                                                            |  |  |  |  |  |  |
| Ronald                            | Akhras          |                       |                  |             |                                          | Principal Investigator                                  |                                                                                            |  |  |  |  |  |  |

Supplemental Online Content: Nonauthor Collaborators

\*Indicates required information. Only first name, last name, and suffix will appear in PubMed.

| *First Name and Middle Initial(s) | *Last Name | *Suffix (eg, Jr, III) | Academic Degrees | Institution | Location (city, state/province, country) | Role or Contribution, eg, chair, principal investigator | Group (if more than 1 Group listed in the byline) and/or Subgroup (eg, Steering Committee) |  |  |  |  |  |  |
|-----------------------------------|------------|-----------------------|------------------|-------------|------------------------------------------|---------------------------------------------------------|--------------------------------------------------------------------------------------------|--|--|--|--|--|--|
| Richard                           | Assef      |                       |                  |             |                                          | Sub-Investigator                                        |                                                                                            |  |  |  |  |  |  |
| Elise                             | Irani      |                       |                  |             |                                          | Study Coordinator                                       |                                                                                            |  |  |  |  |  |  |
| Rania                             | Khayat     |                       |                  |             |                                          | Study Coordinator                                       |                                                                                            |  |  |  |  |  |  |
| Scott                             | Guidolin   |                       |                  |             |                                          | Payment Contact                                         |                                                                                            |  |  |  |  |  |  |
|                                   |            |                       |                  |             |                                          |                                                         |                                                                                            |  |  |  |  |  |  |
| Anil                              | Gupta      |                       |                  |             |                                          | Principal Investigator                                  |                                                                                            |  |  |  |  |  |  |
| David                             | Price      |                       |                  |             |                                          | Sub-Investigator                                        |                                                                                            |  |  |  |  |  |  |
| Amisha                            | Gandhi     |                       |                  |             |                                          | Study Coordinator (Primary, blinded)                    |                                                                                            |  |  |  |  |  |  |
| Ajay                              | Chhabra    |                       |                  |             |                                          | Study Coordinator (Primary, unblinded)                  |                                                                                            |  |  |  |  |  |  |
| Bhavya                            | Gandhi     |                       |                  |             |                                          | Study Coordinator (Back-up)                             |                                                                                            |  |  |  |  |  |  |
| Shrey                             | Acharya    |                       |                  |             |                                          | Study Coordinator (Back-up)                             |                                                                                            |  |  |  |  |  |  |
| Maheshwari                        | Panchal    |                       |                  |             |                                          | Lab Technician (Main)                                   |                                                                                            |  |  |  |  |  |  |
| Bindu                             | Kansal     |                       |                  |             |                                          | Lab Technician (Back-up)                                |                                                                                            |  |  |  |  |  |  |
| Gordon                            | Bailey     |                       |                  |             |                                          | Principal Investigator                                  |                                                                                            |  |  |  |  |  |  |
| Paula                             | Harvalik   |                       |                  |             |                                          | Study Coordinator (blinded)                             |                                                                                            |  |  |  |  |  |  |
| Kerri                             | Demchuk    |                       |                  |             |                                          | Study Coordinator (Primary, unblinded)                  |                                                                                            |  |  |  |  |  |  |
| Manish                            | Saxena     |                       |                  |             |                                          | Principal Investigator                                  |                                                                                            |  |  |  |  |  |  |
| David                             | Collier    |                       |                  |             |                                          | Sub-Investigator                                        |                                                                                            |  |  |  |  |  |  |
| Colvell                           | David      |                       |                  |             |                                          | Pharmacy Technician                                     |                                                                                            |  |  |  |  |  |  |
| Benildo Jr                        | Quiros     |                       |                  |             |                                          | Study Coordinator (Unblinded)                           |                                                                                            |  |  |  |  |  |  |
| Mital                             | Patel      |                       |                  |             |                                          | Study Coordinator (Unblinded)                           |                                                                                            |  |  |  |  |  |  |
| Armida                            | Balawon    |                       |                  |             |                                          | Study Coordinator                                       |                                                                                            |  |  |  |  |  |  |
| Francis                           | Galera     |                       |                  |             |                                          | Study Coordinator                                       |                                                                                            |  |  |  |  |  |  |
| Ania                              | Michalska  |                       |                  |             |                                          | Research Nurse                                          |                                                                                            |  |  |  |  |  |  |
| Brian                             | Piniera    |                       |                  |             |                                          | Research Nurse                                          |                                                                                            |  |  |  |  |  |  |
| Rahat                             | Uddin      |                       |                  |             |                                          | Clinical Trial Practitioner                             |                                                                                            |  |  |  |  |  |  |
| Joanna                            | Abbott     |                       |                  |             |                                          | Principal Investigator                                  |                                                                                            |  |  |  |  |  |  |
| Karen                             | Faulkner   |                       |                  |             |                                          | Sub-Investigator                                        |                                                                                            |  |  |  |  |  |  |
| Tamer                             | Yousef     |                       |                  |             |                                          | Sub-Investigator                                        |                                                                                            |  |  |  |  |  |  |
| Kyle                              | Love       |                       |                  |             |                                          | Data Management/Study coordinator (Primary)             |                                                                                            |  |  |  |  |  |  |
| Ariella                           | Zagdanski  |                       |                  |             |                                          | Data Management/Study coordinator                       |                                                                                            |  |  |  |  |  |  |
| Susan                             | Slaney     |                       |                  |             |                                          | Research Nurse                                          |                                                                                            |  |  |  |  |  |  |
| Michelle                          | Anderson   |                       |                  |             |                                          | Study Nurse                                             |                                                                                            |  |  |  |  |  |  |
| Aimee                             | Leath      |                       |                  |             |                                          | Laboratory/Research Associate                           |                                                                                            |  |  |  |  |  |  |
| Cheryl                            | Dunlop     |                       |                  |             |                                          | Payment Contact                                         |                                                                                            |  |  |  |  |  |  |
| Elizabeth                         | Hardy      |                       |                  |             |                                          | Payment Contact                                         |                                                                                            |  |  |  |  |  |  |
| Shannon                           | Wall       |                       |                  |             |                                          | Payment Contact                                         |                                                                                            |  |  |  |  |  |  |
|                                   |            |                       |                  |             |                                          |                                                         |                                                                                            |  |  |  |  |  |  |
| Tamer                             | Yousef     |                       |                  |             |                                          | Principal Investigator                                  |                                                                                            |  |  |  |  |  |  |
| Karen                             | Faulkner   |                       |                  |             |                                          | Sub-Investigator                                        |                                                                                            |  |  |  |  |  |  |

Supplemental Online Content: Nonauthor Collaborators

\*Indicates required information. Only first name, last name, and suffix will appear in PubMed.

| *First Name and Middle Initial(s) | *Last Name    | *Suffix (eg, Jr, III) | Academic Degrees | Institution | Location (city, state/province, country) | Role or Contribution, eg, chair, principal investigator                                         | Group (if more than 1 Group listed in the byline) and/or Subgroup (eg, Steering Committee) |  |  |  |  |  |  |
|-----------------------------------|---------------|-----------------------|------------------|-------------|------------------------------------------|-------------------------------------------------------------------------------------------------|--------------------------------------------------------------------------------------------|--|--|--|--|--|--|
| Osman                             | El-Koubani    |                       |                  |             |                                          | Sub-Investigator                                                                                |                                                                                            |  |  |  |  |  |  |
| Tracy                             | Kelt          |                       |                  |             |                                          | Study Coordinator, Primary                                                                      |                                                                                            |  |  |  |  |  |  |
| Billy-Jean                        | Connolly      |                       |                  |             |                                          | Study Coordinator                                                                               |                                                                                            |  |  |  |  |  |  |
| Cheryl                            | Marmion       |                       |                  |             |                                          | Study Coordinator                                                                               |                                                                                            |  |  |  |  |  |  |
| Maheswari                         | Alapati       |                       |                  |             |                                          | Study Coordinator                                                                               |                                                                                            |  |  |  |  |  |  |
| Louise                            | Simmons       |                       |                  |             |                                          | Research Associate                                                                              |                                                                                            |  |  |  |  |  |  |
| Caroline                          | Colquhoun     |                       |                  |             |                                          | Research Nurse                                                                                  |                                                                                            |  |  |  |  |  |  |
| Darren                            | Clyde         |                       |                  |             |                                          | Study Nurse                                                                                     |                                                                                            |  |  |  |  |  |  |
| Adrian                            | Mooty         |                       |                  |             |                                          | Recruitment and Retention                                                                       |                                                                                            |  |  |  |  |  |  |
| Nicole                            | Mullen        |                       |                  |             |                                          | Recruitment and Retention                                                                       |                                                                                            |  |  |  |  |  |  |
|                                   |               |                       |                  |             |                                          |                                                                                                 |                                                                                            |  |  |  |  |  |  |
| Marianne                          | Viljoen       |                       |                  |             |                                          | Principal Investigator                                                                          |                                                                                            |  |  |  |  |  |  |
| Lucy                              | Trevor        |                       |                  |             |                                          | Old Principal Investigator (from Jul-22 to Feb-23) and Sub-Investigator (from May-22 to Jul-22) |                                                                                            |  |  |  |  |  |  |
| Carol                             | Pretswell     |                       |                  |             |                                          | Sub-Investigator                                                                                |                                                                                            |  |  |  |  |  |  |
| Catherine                         | Austin        |                       |                  |             |                                          | Sub-Investigator                                                                                |                                                                                            |  |  |  |  |  |  |
| Chigomezgo                        | Munthali      |                       |                  |             |                                          | Sub-Investigator                                                                                |                                                                                            |  |  |  |  |  |  |
| Imrozia                           | Munsoor       |                       |                  |             |                                          | Sub-Investigator                                                                                |                                                                                            |  |  |  |  |  |  |
| Karen                             | Faulkner      |                       |                  |             |                                          | Sub-Investigator                                                                                |                                                                                            |  |  |  |  |  |  |
| Madhu                             | Venkate Gowda |                       |                  |             |                                          | Sub-Investigator                                                                                |                                                                                            |  |  |  |  |  |  |
| Pembe                             | Ozunlu        |                       |                  |             |                                          | Sub-Investigator                                                                                |                                                                                            |  |  |  |  |  |  |
| Peter                             | Keighley      |                       |                  |             |                                          | Sub-Investigator                                                                                |                                                                                            |  |  |  |  |  |  |
| Alison                            | Jones         |                       |                  |             |                                          | Pharmacist                                                                                      |                                                                                            |  |  |  |  |  |  |
| Annette                           | James         |                       |                  |             |                                          | Pharmacist                                                                                      |                                                                                            |  |  |  |  |  |  |
| Joanne                            | Pollitt       |                       |                  |             |                                          | Pharmacist                                                                                      |                                                                                            |  |  |  |  |  |  |
| Wendy                             | Littlewood    |                       |                  |             |                                          | Pharmacist                                                                                      |                                                                                            |  |  |  |  |  |  |
| Lena                              | Al-Sheikhly   |                       |                  |             |                                          | Study Coordinator, Primary                                                                      |                                                                                            |  |  |  |  |  |  |
| David                             | Lee           |                       |                  |             |                                          | Study Coordinator                                                                               |                                                                                            |  |  |  |  |  |  |
| Denise                            | Nistor        |                       |                  |             |                                          | Study Coordinator                                                                               |                                                                                            |  |  |  |  |  |  |
| Elaine                            | Roberts       |                       |                  |             |                                          | Study Coordinator                                                                               |                                                                                            |  |  |  |  |  |  |
| Gayle                             | Mawdsley      |                       |                  |             |                                          | Study Coordinator                                                                               |                                                                                            |  |  |  |  |  |  |
| Kamila                            | Sobolewska    |                       |                  |             |                                          | Study Coordinator                                                                               |                                                                                            |  |  |  |  |  |  |
| Katrina                           | Hannis        |                       |                  |             |                                          | Study Coordinator                                                                               |                                                                                            |  |  |  |  |  |  |
| Klaudia                           | Wojtkiewicz   |                       |                  |             |                                          | Study Coordinator                                                                               |                                                                                            |  |  |  |  |  |  |
| Lauren                            | Stopford      |                       |                  |             |                                          | Study Coordinator                                                                               |                                                                                            |  |  |  |  |  |  |
| Lindsay                           | Halliwell     |                       |                  |             |                                          | Study Coordinator                                                                               |                                                                                            |  |  |  |  |  |  |
| Veronica                          | Mort          |                       |                  |             |                                          | Study Coordinator                                                                               |                                                                                            |  |  |  |  |  |  |
| Victoria                          | McGrath       |                       |                  |             |                                          | Study Coordinator                                                                               |                                                                                            |  |  |  |  |  |  |
| Harry                             | Osborne       |                       |                  |             |                                          | Research Nurse                                                                                  |                                                                                            |  |  |  |  |  |  |
| Alison                            | Merrick       |                       |                  |             |                                          | Study Nurse                                                                                     |                                                                                            |  |  |  |  |  |  |
| Cathrine                          | Basikolo      |                       |                  |             |                                          | Study Nurse                                                                                     |                                                                                            |  |  |  |  |  |  |

Supplemental Online Content: Nonauthor Collaborators

\*Indicates required information. Only first name, last name, and suffix will appear in PubMed.

| *First Name and Middle Initial(s) | *Last Name | *Suffix (eg, Jr, III) | Academic Degrees | Institution | Location (city, state/province, country) | Role or Contribution, eg, chair, principal investigator | Group (if more than 1 Group listed in the byline) and/or Subgroup (eg, Steering Committee) |  |  |  |  |  |  |
|-----------------------------------|------------|-----------------------|------------------|-------------|------------------------------------------|---------------------------------------------------------|--------------------------------------------------------------------------------------------|--|--|--|--|--|--|
| Inge                              | Ghysels    |                       |                  |             |                                          | Study Nurse                                             |                                                                                            |  |  |  |  |  |  |
| Laura                             | Fenlon     |                       |                  |             |                                          | Study Nurse                                             |                                                                                            |  |  |  |  |  |  |
| Lucy                              | Beech      |                       |                  |             |                                          | Study Nurse                                             |                                                                                            |  |  |  |  |  |  |
| Olga Lusquinos                    | Munoz      |                       |                  |             |                                          | Study Nurse                                             |                                                                                            |  |  |  |  |  |  |
| Sarah                             | Bilton     |                       |                  |             |                                          | Study Nurse                                             |                                                                                            |  |  |  |  |  |  |
| Lyne                              | Goddard    |                       |                  |             |                                          | Laboratory Contact                                      |                                                                                            |  |  |  |  |  |  |
| Tracey                            | Gillon     |                       |                  |             |                                          | Laboratory Contact                                      |                                                                                            |  |  |  |  |  |  |
| Stacy                             | Taylor     |                       |                  |             |                                          | Health Care Assistant                                   |                                                                                            |  |  |  |  |  |  |
| Brianne                           | Tyson      |                       |                  |             |                                          | Patient Services                                        |                                                                                            |  |  |  |  |  |  |
| Victoria                          | Connor     |                       |                  |             |                                          | Patient Services                                        |                                                                                            |  |  |  |  |  |  |
| Hannah                            | Felber     |                       |                  |             |                                          | Patient Services Assistant                              |                                                                                            |  |  |  |  |  |  |
| Angela                            | Fallows    |                       |                  |             |                                          | Patient Services Coordination                           |                                                                                            |  |  |  |  |  |  |
| Jacqueline                        | Clowes     |                       |                  |             |                                          | Patient Services Coordination                           |                                                                                            |  |  |  |  |  |  |
| Shirley                           | Cheung     |                       |                  |             |                                          | Site Compliance                                         |                                                                                            |  |  |  |  |  |  |
