# Supplementary material
Source: PubMed Central journal article supplement (PMC10873804)
Supplement: jama-e240728-s005.pdf [file jama-e240728-s005.pdf]

## Data Sharing Statement

### Data

**Data available:** Yes

**Data types:** Deidentified participant data

**How to access data:** Access to Anonymized individual participant data that support these results is made available 12 months after study completion and not less than 12 months after the product and indication have been approved in the US and/or the EU.

**When available:** beginning date: 12-31-2025

### Supporting Documents

**Document types:** None

### Additional Information

**Who can access the data:** Access will be provided contingent upon the approval of a research proposal and the execution of a data sharing agreement. Requests for access to data can be submitted via the website [www.vivli.org](http://www.vivli.org).

**Types of analyses:** Access will be provided contingent upon the approval of a research proposal and the execution of a data sharing agreement. Requests for access to data can be submitted via the website [www.vivli.org](http://www.vivli.org).

**Mechanisms of data availability:** Access will be provided contingent upon the approval of a research proposal and the execution of a data sharing agreement. Requests for access to data can be submitted via the website [www.vivli.org](http://www.vivli.org).
